# Supplementary material for: Unraveling the dual defect sites in graphite carbon nitride for ultra-high photocatalytic H2O2 evolution
Source: Royal Society of Chemistry journal article supplement (doi:10.1039/d1ee02369a), 2022-01-01
Supplement: d1ee02369a1.pdf [file d1ee02369a1.pdf]

## Supporting Information

### Unraveling the Dual Defect Sites in Graphite Carbon Nitride for

### Ultra-high Photocatalytic H<sub>2</sub>O<sub>2</sub> Evolution

Xu Zhang<sup>a</sup>, Peijie Ma<sup>a</sup>, Cong Wang<sup>\*a</sup>, Liyong Gan<sup>b</sup>, Xianjie Chen<sup>c</sup>, Peng Zhang<sup>d</sup>,  
Yang Wang<sup>b</sup>, Hui Li<sup>a</sup>, Lihua Wang<sup>a</sup>, Xiaoyuan Zhou<sup>\*b</sup> and Kun Zheng<sup>\*a</sup>

X. Zhang, P.J. Ma, Dr. C. Wang, H. Li, Prof. L. H. Wang, Prof. K. Zheng  
Beijing Key Lab of Microstructure and Properties of Solids, Faculty of Materials and  
Manufacturing, Beijing University of Technology, Beijing, 100124, China  
E-mail: [smartswang@bjut.edu.cn](mailto:smartswang@bjut.edu.cn); [kunzheng@bjut.edu.cn](mailto:kunzheng@bjut.edu.cn)

Prof. L.Y. Gan, Prof. X.Y. Zhou, Y. Wang

College of Physics and Institute of Advanced Interdisciplinary Studies  
Chongqing University  
Chongqing 400044, P. R. China  
E-mail: [xiaoyuan2013@cqu.edu.cn](mailto:xiaoyuan2013@cqu.edu.cn)

Dr. X.J. Chen

State Key Laboratory of Environmental-Friendly Energy Materials, School of  
Materials Science and Engineering, Southwest University of Science and Technology,  
Mianyang 621010, China

Prof. Peng Zhang

Key Laboratory of Organic Compound Pollution Control Engineering (MOE), School  
of Environmental and chemical engineering, Shanghai University, Shanghai 200444,  
China

## 1. Experimental section

### 1.1. Synthesis of samples

All chemicals used in this work are of analytical grade and no further purification is required before use.

**Synthesis of pristine g-C<sub>3</sub>N<sub>4</sub> (PCN) and TCN:** Briefly, 10 g of urea was put into an alumina crucible with a lid, and the temperature was increased to 550 °C for 2 h in air at a rate of 5 °C min<sup>-1</sup>. The capacity of the crucibles used in this work were 100 ml. After the crucible was cooled to room temperature, the product was collected and ground into powder, washed with deionized water several times, and vacuum dried at 80 °C for 12 h. The TCN was synthesized by the same method except that the precursor used was thiourea.

**Synthesis of cyano-modified g-C<sub>3</sub>N<sub>4</sub> (C≡N-CN):** The cyano-modified g-C<sub>3</sub>N<sub>4</sub> was synthesized by heating the supramolecular precursor of urea and thiourea in different ratios. In detail, different mass ratios of urea and thiourea (1:1, 1:2, 1:3, total mass: 10 g) were respectively dispersed in 20 ml of deionized water. After them was fully dissolved, the two solutions were mixed and stirred and dried at 60 °C. Collected the white supramolecular precursor and grinded it into a powder, then place it in a 100 ml crucible with a lid and heat it to 550 °C for 2 h in air with ramping rate of 5 °C min<sup>-1</sup> (Wrap the crucible with tin foil to maintain tightness). After cooling to room temperature, the obtained powders were washed with ethanol and deionized water

several times and vacuum dry at 80 °C for 12 h. The obtained g-C<sub>3</sub>N<sub>4</sub> modified with -C≡N groups were named C≡N-CN, C≡N-CN<sub>1</sub> and C≡N-CN<sub>2</sub>, respectively.

**Synthesis of Nv-C≡N-CN:** The Nv-C≡N-CN was synthesized by calcining C≡N-CN in a tube furnace under argon atmosphere. 250 mg C≡N-CN was fully milled and heated to 550 °C for 2 h at a heating rate of 5 °C min<sup>-1</sup> in an argon atmosphere (argon flow rate is 100 ml min<sup>-1</sup>). After cooling to room temperature, the obtained powders were washed with deionized water and ethanol several times, and vacuum dried at 80 °C for 12 h.

**Synthesis of Nv-CN:** 250 mg of PCN was heated to 550 °C for 2 h in an argon atmosphere (argon flow rate is 100 ml min<sup>-1</sup>) at a heating rate of 5 °C min<sup>-1</sup>. After cooling to room temperature, the obtained powder was washed several times and vacuum dried at 80 °C for 12 h.

## 1.2. Characterization

The X-ray diffraction (XRD) patterns of the samples were collected on a PANalytical B.V. X'Pert Powder X-ray diffractometer with Cu K $\alpha$  radiation at 40 kV and 40 mA. The Fourier transform infrared (FTIR) spectra were obtained on Bruker V70 spectrometer. X-ray photoelectron spectroscopy (XPS) measurements were acquired on an ESCALAB 250Xi instrument (Thermo Fisher Scientific) using Al K $\alpha$  radiation, and the calibration peak was C 1s at 284.8 eV. UV-Vis diffuse reflectance spectroscopy

(DRS) of the samples were collected on Shimadzu UV-3600 instrument with BaSO<sub>4</sub> as reference. Solid-state <sup>13</sup>C MAS NMR spectra were measured on Bruker AVANCE III 400MHz WB solid-state NMR spectrometer at room temperature. Photoluminescence (PL) spectra were measured on Hitachi F-7000 fluorescence spectrometer with an excitation wavelength of 325 nm. Time-resolved photoluminescence (TRPL) spectra were collected on Edinburgh FLS1000 fluorescence spectrometer with an excitation wavelength of 375 nm. The room temperature electron paramagnetic resonance (EPR) spectra of the samples were measured by JOEL JES-FA200 spectrometer. The C and N content of the samples were measured by an element analyzer (Vario MACRO). The microstructure and surface morphology of the samples were studied by transmission electron microscopy (TEM, TEI-Tecnai-Talos) and scanning electron microscopy (SEM, Thermo Fisher Scientific Quattro S). The N<sub>2</sub> adsorption-desorption isotherms and pore-size distributions of the samples were measured at 77 K using micrometrics Max-II system. Before the experiments, the samples were degassed in a vacuum environment at 180 °C for 10 h, and the specific surface areas of all samples were calculated according to the Brunauer-Emmett-Teller (BET) method. Raman spectra were acquired on a high-resolution confocal Raman spectrometer (RENISHAW inVia) with an excitation laser of 785nm. The spectra were collected by using a ×50 L objective lens for 10 s with a laser spot diameter of about 1 μm and power of 0.5mW for all acquisitions.

### 1.3. Photoelectrochemical measurements

The electrochemical impedance spectroscopy (EIS), photocurrent response, and Mott–Schottky plots were measured on the electrochemical workstation (CHI600A). The electrochemical workstation was a standard three-electrode system, in which the catalyst-coated ITO was the working electrode, the Pt wire was the counter electrode and the saturated calomel electrode was the reference electrode.

### 1.4. Photocatalytic reduction of O<sub>2</sub> to H<sub>2</sub>O<sub>2</sub>

20 mg of photocatalyst was placed in 20 ml of pure water (1 g L<sup>-1</sup>), and ultrasonicated for 30 minutes until the catalyst powder was completely dispersed. After that, O<sub>2</sub> was continuously injected into the solution for 30 min under dark conditions to make the O<sub>2</sub> saturated. After 30 min, the flow rate of O<sub>2</sub> was controlled to 300 ml min<sup>-1</sup>. The reaction solution was irradiated under a 300 W Xe lamp with 420 nm cutoff film ( $\lambda \geq 420$  nm) to start the photoreaction test. The average light intensity was 40 mW cm<sup>-2</sup>. The entire photoreaction process used a stirrer and circulating water to control the reaction temperature at 25 °C. Every 15min, 1.5 ml of the reaction solution was taken out to remove the photocatalyst by centrifugation and filtration. To explore the influence of H<sup>+</sup> concentration on the reaction, the pH of the reaction solution was adjusted by HClO<sub>4</sub> and KOH. Replaced pure water with 10% isopropanol solution for the reaction under sacrificial agent conditions.

In order to explore the influence of different sacrificial agents on the H<sub>2</sub>O<sub>2</sub> generation activity under the same conditions, the concentration of BQ and AgNO<sub>3</sub> added to the reaction system were both 1mM, and the concentration of TBA added to the reaction

system was 1%. In order to explore the influence of different gases (N<sub>2</sub> or O<sub>2</sub>) on the photocatalytic H<sub>2</sub>O<sub>2</sub> generation activity, N<sub>2</sub> was continuously injected into the reaction solution under dark conditions for 60 minutes to ensure that there was no residual O<sub>2</sub>. After that, the photocatalysis test was carried out under the condition of continuous N<sub>2</sub> flow. Under the same conditions, the 420 nm cutoff film (visible light,  $\lambda \geq 420$  nm) of the 300 W Xe lamp was replaced with an AM 1.5G filter (simulate sunlight) to compare the effects of different light sources on the photocatalytic H<sub>2</sub>O<sub>2</sub> generation activity. In addition, the decomposition rate of H<sub>2</sub>O<sub>2</sub> on different samples were tested in 1 mM H<sub>2</sub>O<sub>2</sub> solution.

The amount of H<sub>2</sub>O<sub>2</sub> was determined by iodometry.<sup>1</sup> 0.5 ml of 0.4 mol L<sup>-1</sup> potassium iodide (KI) solution and 0.5 ml of 0.1 mol L<sup>-1</sup> potassium hydrogen phthalate (C<sub>8</sub>H<sub>5</sub>KO<sub>4</sub>) solution were added to 1 ml obtained solution and kept for 30min. H<sub>2</sub>O<sub>2</sub> reacted with I<sup>-</sup> under acidic conditions to form I<sub>3</sub><sup>-</sup> (H<sub>2</sub>O<sub>2</sub> + 3I<sup>-</sup> + 2H<sup>+</sup> → I<sub>3</sub><sup>-</sup> + 2H<sub>2</sub>O), which has a strong absorption at about 350 nm. The content of I<sub>3</sub><sup>-</sup> was determined by measuring the absorbance at 350 nm by UV-vis spectroscopy, from which the total amount of H<sub>2</sub>O<sub>2</sub> produced during the reaction can be calculated. **Figure S24** shows the standard curve of H<sub>2</sub>O<sub>2</sub> and the raw data of the UV-vis absorption spectrum of H<sub>2</sub>O<sub>2</sub> generated by Nv-C≡N-CN in pure water under visible light ( $\lambda \geq 420$  nm).

The apparent quantum yield (AQY) of H<sub>2</sub>O<sub>2</sub> formed on Nv-C≡N-CN under the conditions of pure water and sacrificial agent were tested separately. The AQY test used a 300 W Xe lamp with different bandpass filters of 400, 420, 450, 500, and 550 nm (FWHM=15 nm). The concentration of the photocatalyst in the reaction solution was

still 1 g L<sup>-1</sup>. The irradiation area was controlled to 1.69 cm<sup>2</sup> and the optical power meter (Thorlabs) determined the average light intensity. The AQY was calculated by the following formula:

$$\text{AQY} = \frac{2 \times \text{H}_2\text{O}_2 \text{ formed (mol)}}{\text{the number of incident photons (mol)}} \times 100\%$$

The solar-to-chemical conversion efficiency test was carried out with the photocatalyst in pure water (1g L<sup>-1</sup>) and AM 1.5G light source. The solar-to-chemical conversion (SCC) efficiency is determined by the following formula:

$$\text{SCC} = \frac{[\Delta G_{\text{H}_2\text{O}_2}] \times [n_{\text{H}_2\text{O}_2}]}{I \times S \times T} \times 100\%$$

where  $\Delta G_{\text{H}_2\text{O}_2}$ ,  $n_{\text{H}_2\text{O}_2}$ , I, S, and T represent the free energy for H<sub>2</sub>O<sub>2</sub> generation (117 KJ mol<sup>-1</sup>), the molar amount of H<sub>2</sub>O<sub>2</sub> generated, the energy intensity of the AM 1.5G solar irradiation (100 mW cm<sup>-2</sup>), the irradiated sample area and the irradiation time (s), respectively.

### 1.5. Photocatalytic oxygen generation

The photocatalytic oxygen generation reaction was tested in a Pyrex top-irradiated reaction vessel under visible light irradiation and the reactor was connected to the PerfectLight glass enclosed gas system (Labsolar-6A). 30 mg of photocatalyst was dispersed in 30 ml of pure water. After that, AgNO<sub>3</sub> (20 mM) was added to the reaction solution as an electron acceptor, and La<sub>2</sub>O<sub>3</sub> (30 mg) was added to maintain the pH of the reaction solution. N<sub>2</sub> was passed into the reactor for 30 minutes to remove residual gas. The photocatalytic O<sub>2</sub> generation was performed under the visible light irradiation ( $\lambda \geq 420$  nm) of a 300W xenon lamp. The generated O<sub>2</sub> was detected by an online gas chromatograph (5Å molecular sieve column, Ar carrier).

## 1.6. Electrochemical measurement of oxygen reduction reaction (ORR)

Rotating ring-disk electrode (RRDE) was used to measure the number of transferred electrons ( $n$ ) and  $H_2O_2$  selectivity of the sample in the ORR reaction. The electrochemical measurement used a three-electrode system, in which RRDE was the working electrode, Ag/AgCl was the reference electrode, and Pt/C was the counter electrode. And  $O_2$ -saturated 0.1M KOH solution as electrolyte. The speed of RRDE was set to 1600 rpm and the potential range was set to 0-1.0 V vs. RHE. The catalyst ink on the RRDE working electrode is prepared as follows. 4 mg of the catalyst was fully ground and placed in 300  $\mu$ L of pure water, 700  $\mu$ L of isopropanol, and 10  $\mu$ L of Nafion solution (4%) for ultrasonic dispersion for 1 h. Next, 10  $\mu$ L of ink was dropped on the RRDE electrode and dried at room temperature (the catalyst loading was approximately 0.161 mg  $cm^{-2}$ ).

The number of transferred electrons ( $n$ ) is calculated according to the following formula:

$$n = \frac{I_d}{I_d + I_r/N} \times 100\%$$

The selectivity of  $H_2O_2$  is calculated according to the following formula:

$$H_2O_2(\%) = \frac{I_r/N}{I_d + I_r/N} \times 100\%$$

Where  $I_r$  is the ring current,  $I_d$  is the disc current, and  $N$  is the collection efficiency ( $N=0.37$ ).



## 2. Computational methods

We have employed the Vienna Ab Initio Package (VASP) to perform all the density functional theory (DFT) calculations within the generalized gradient approximation (GGA) using the PBE formulation. We have chosen the projected augmented wave (PAW) potentials to describe the ionic cores and take valence electrons into account using a plane wave basis set with a kinetic energy cutoff of 400 eV. Partial occupancies of the Kohn–Sham orbitals were allowed using the Gaussian smearing method and a width of 0.05 eV. The electronic energy was considered self-consistent when the energy change was smaller than  $10^{-5}$  eV. A geometry optimization was considered convergent when the force change was smaller than 0.02 eV/Å. Grimme’s DFT-D3 methodology was used to describe the dispersion interactions.

The equilibrium lattice constants of rectangular g-C<sub>3</sub>N<sub>4</sub> monolayer unit cell were optimized, when put in a vacuum in the depth of 20 Å and using a 9×5×3 Monkhorst-Pack k-point grid for Brillouin zone sampling, to be a=7.136 Å, b=12.359 Å. We then use it to construct a Y-direction-edged g-C<sub>3</sub>N<sub>4</sub> monolayer model with *p* (2×1) periodicity in the x and y directions and 2 stoichiometric layers in the z direction separated by a vacuum layer in the depth of 20 Å in order to separate the surface slab from its periodic duplicates. The unsaturated N atoms on the edge are saturated by H atoms. During structural optimizations, the gamma point in the Brillouin zone was used for k-point sampling, and all atoms were allowed to relax.

The adsorption energy ( $E_{\text{ads}}$ ) of adsorbate A was defined as

$$E_{\text{ads}} = E_{\text{A/surf}} - E_{\text{surf}} - E_{\text{A(g)}}$$

where  $E_{A/\text{surf}}$ ,  $E_{\text{surf}}$  and  $E_{A(\text{g})}$  are the energy of adsorbate A adsorbed on the surface, the energy of clean surface, and the energy of isolated A molecule in a cubic periodic box with a side length of 20 Å and a  $1 \times 1 \times 1$  Monkhorst-Pack k-point grid for Brillouin zone sampling, respectively.

The free energy of a gas phase molecule or an adsorbate on the surface was calculated by the equation  $G = E + \text{ZPE} - TS$ , where E is the total energy, ZPE is the zero-point energy, T is the temperature in kelvin (298.15 K is set here), and S is the entropy.

The process of  $2e^-$  ORR proceeds as the following equation:

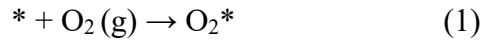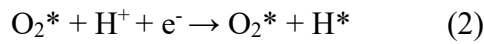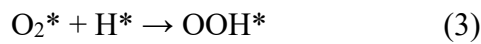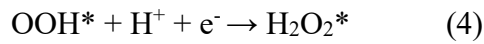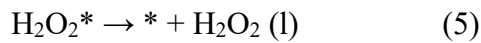

Where \* represents the surface-active site.

The  $\text{N}_{2\text{C}}$  vacancy formation energy of  $\text{N}_{\text{V-X}}\text{-C}\equiv\text{N-CN}$  ( $x=1, 2, 3, 4, 5, 6$ ) is calculated by the following formula:

$$E_f = E_{(\text{N}_{2\text{C}})} + E_{(\text{N atom})} - E_{\text{original-C}\equiv\text{N-CN}}$$

where  $E_f$  is the  $\text{N}_{2\text{C}}$  vacancy formation energy;  $E_{(\text{N}_{2\text{C}})}$  is the energy of an  $\text{N}_{2\text{C}}$  vacancy in  $\text{C}\equiv\text{N-CN}$  structure;  $E_{\text{original-C}\equiv\text{N-CN}}$  is the total energy of the original  $\text{C}\equiv\text{N-CN}$  (-519.76 eV);  $E_{(\text{N atom})}$  is the energy of one N atom taking into account the spin effect (-3.12 eV).

### 3. Results and discussion (Fig. S1-24 and Table S1-9)

#### 3.1 Fig. S1-S24:

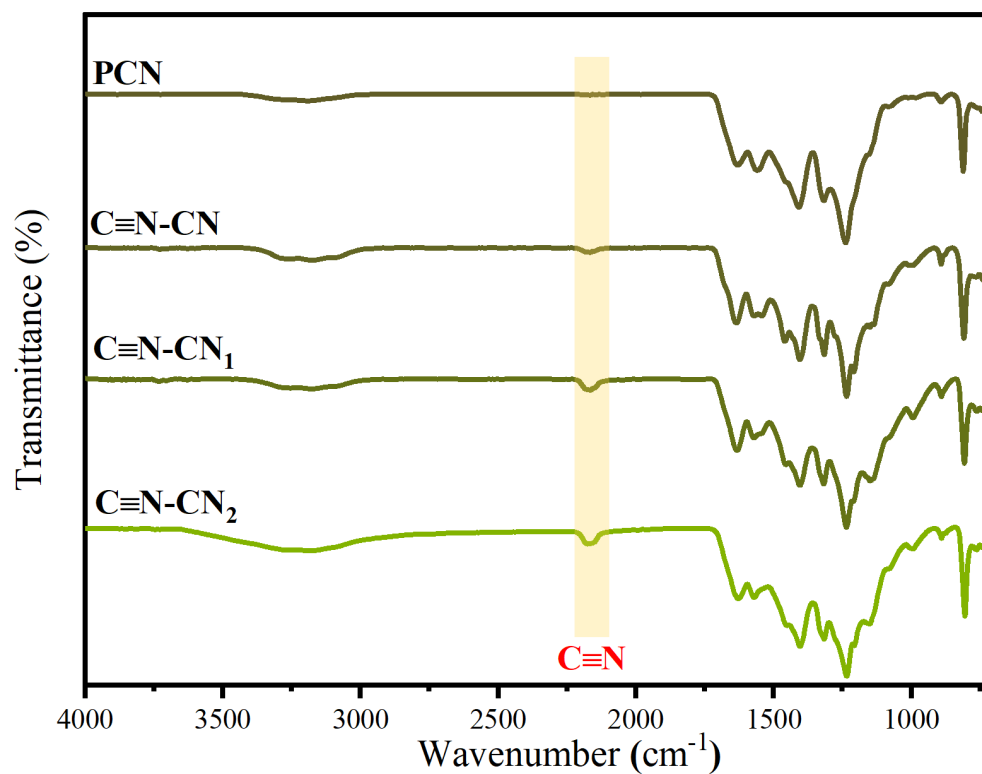

**Fig. S1** FTIR transmission spectra of PCN, C≡N-CN, C≡N-CN<sub>1</sub>, and C≡N-CN<sub>2</sub>.

The ratios of urea to thiourea in the precursors of C≡N-CN, C≡N-CN<sub>1</sub>, and C≡N-CN<sub>2</sub> are 1:1, 1:2, and 1:3, respectively.

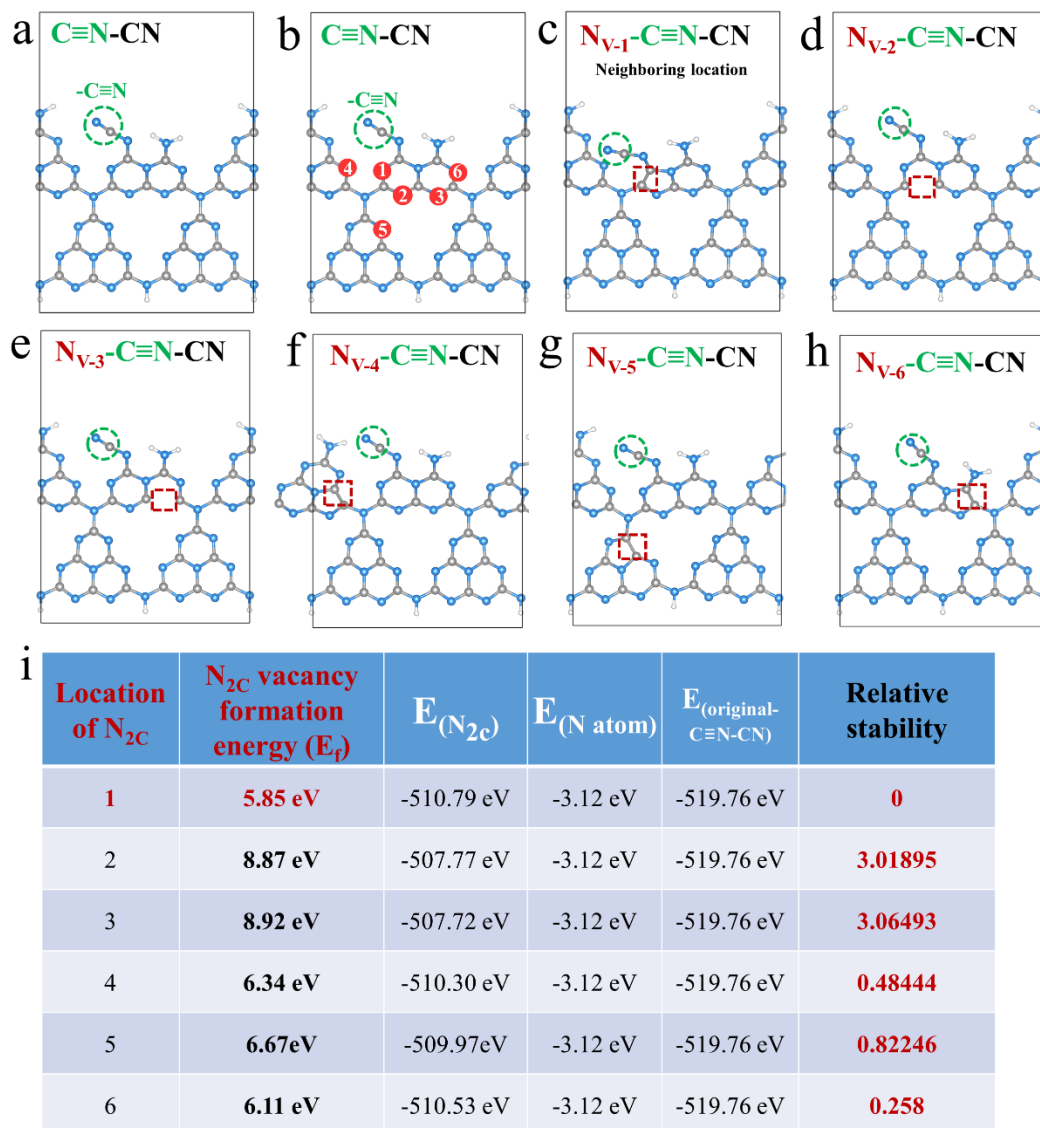

**Fig. S2** (a) The structural model of  $C\equiv N-CN$ . (b) 6 types of  $N_{2C}$  positions selected on  $C\equiv N-CN$ . (c-h) 6 kinds of  $N_{V-x}-C\equiv N-CN$  ( $x=1, 2, 3, 4, 5, 6$ ) with different relative positions of  $-C\equiv N$  group and  $N_{2C}$  vacancy after structural optimization. (i) The formation energy of  $N_{2C}$  vacancies in different positions on  $C\equiv N-CN$  (including original data).

Fig. S2a and Fig. S2b are respectively represented as  $C\equiv N-CN$  and 6 types of selected  $N_{2C}$  atoms at different positions from the  $-C\equiv N$  group on  $C\equiv N-CN$ . After that, we successively created these  $N_{2C}$  vacancies (6 types) at different positions relative to the

-C≡N group on C≡N-CN, and calculated these N<sub>2C</sub> vacancies formation energy (Fig. S2i). In Fig. S2c-h, the 6 models after structural optimization are represented as dual defect sites g-C<sub>3</sub>N<sub>4</sub> with different relative positions of -C≡N group and N vacancy, and they are named as N<sub>V-X</sub>-C≡N-CN in turn (X=1, 2, 3, 4, 5, 6). The calculation results and the original data are shown in Fig. S2i, among the 6 models, the N<sub>2C</sub> vacancy formation energy on N<sub>V-1</sub>-C≡N-CN is the lowest, corresponding to the nearest neighbors of the -C≡N group and the N<sub>2C</sub> vacancy. In order to compare the relative stability, we set the total energy of the N<sub>V-1</sub>-C≡N-CN system as 0. Subtracting N<sub>V-1</sub>-C≡N-CN from the N<sub>2C</sub> vacancy formation energies of the other 5 models (N<sub>V-2-6</sub>-C≡N-CN), it is found that these energies are all positive values (Fig. S2i). This shows that the -C≡N group and N vacancy in the nearest neighbor location are more stable than other positions. According to the principle of least energy, this indicates that the N<sub>2C</sub> vacancy closest to the -C≡N group is easier to form, and such a neighboring location should be more stable. Therefore, the nearest neighbor of -C≡N groups and N<sub>2C</sub> vacancies in N<sub>V</sub>-C≡N-CN was determined (Fig. S2c).

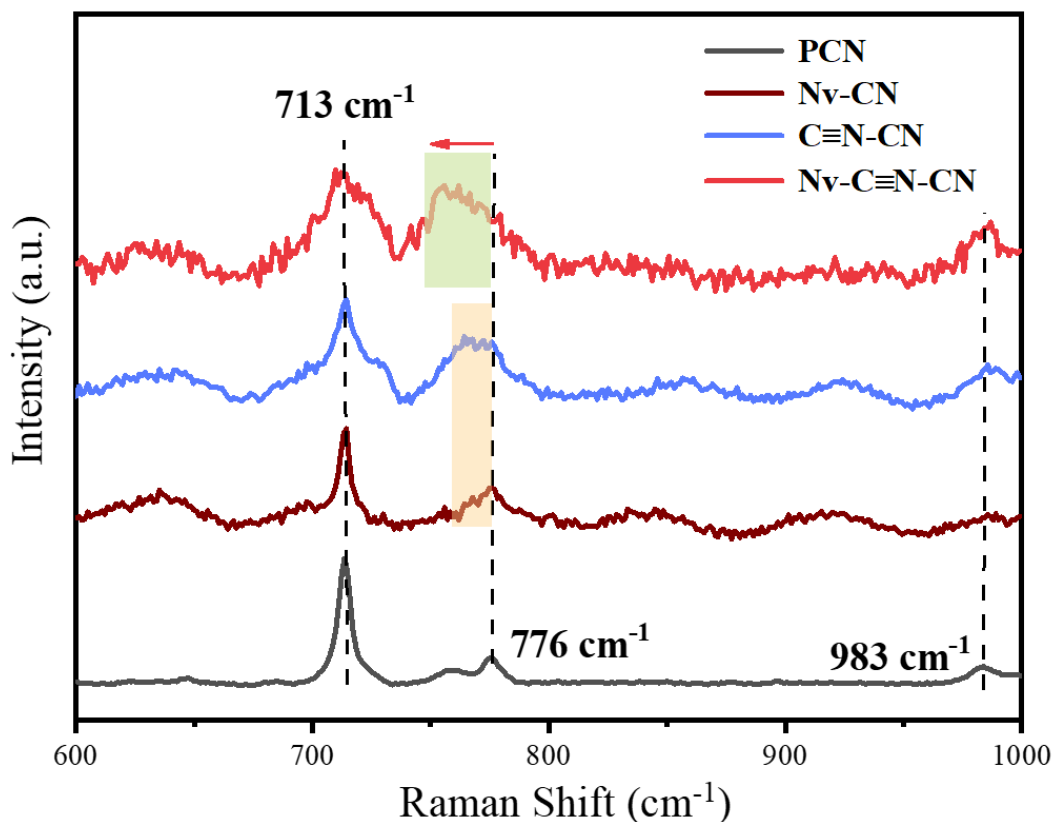

**Fig. S3** Raman spectra of PCN, C≡N-CN, Nv-CN, and Nv-C≡N-CN (laser wavelength: 785 nm; power: 0.5 mW; lens: 50 objective; acquisition time: 10 s).

In **Fig. S3**, the Raman characteristic peaks of the samples are consistent with that reported in the literature.<sup>2</sup> Compared with PCN, the characteristic peak intensity of Nv-CN at 776 cm<sup>-1</sup> is enhanced, which might be the structure change of heptazine caused by the N vacancies. Simultaneously, the Raman peak of C≡N-CN has a slight blue shift. This could be attributed to the structural change caused by the -C≡N groups, which is also related to the increased -C≡N ratio in XPS (**Fig. 2d**). It is worth noting that Nv-C≡N-CN has a larger change, which is manifested as a significant enhancement of the characteristic peak at 755 cm<sup>-1</sup> and an obvious blue shift (from 776 cm<sup>-1</sup> to 755 cm<sup>-1</sup>). From PCN to Nv-C≡N-CN,  $I_{776}/I_{713}$  (Raman peak intensity comparison) in the samples gradually increased, indicating that the accumulated defects have caused changes in the

structure. Furthermore, compared with the single sharp Raman peak of PCN at  $776\text{ cm}^{-1}$ , with the introduction of  $-\text{C}\equiv\text{N}$  groups and N vacancies, the Raman peak at about  $776\text{ cm}^{-1}$  of other samples becomes multimodal vibration ( $\text{Nv}-\text{C}\equiv\text{N}-\text{CN}$  is the most obvious). This may be the influence of neighboring  $-\text{C}\equiv\text{N}$  groups and N vacancies on the structure.

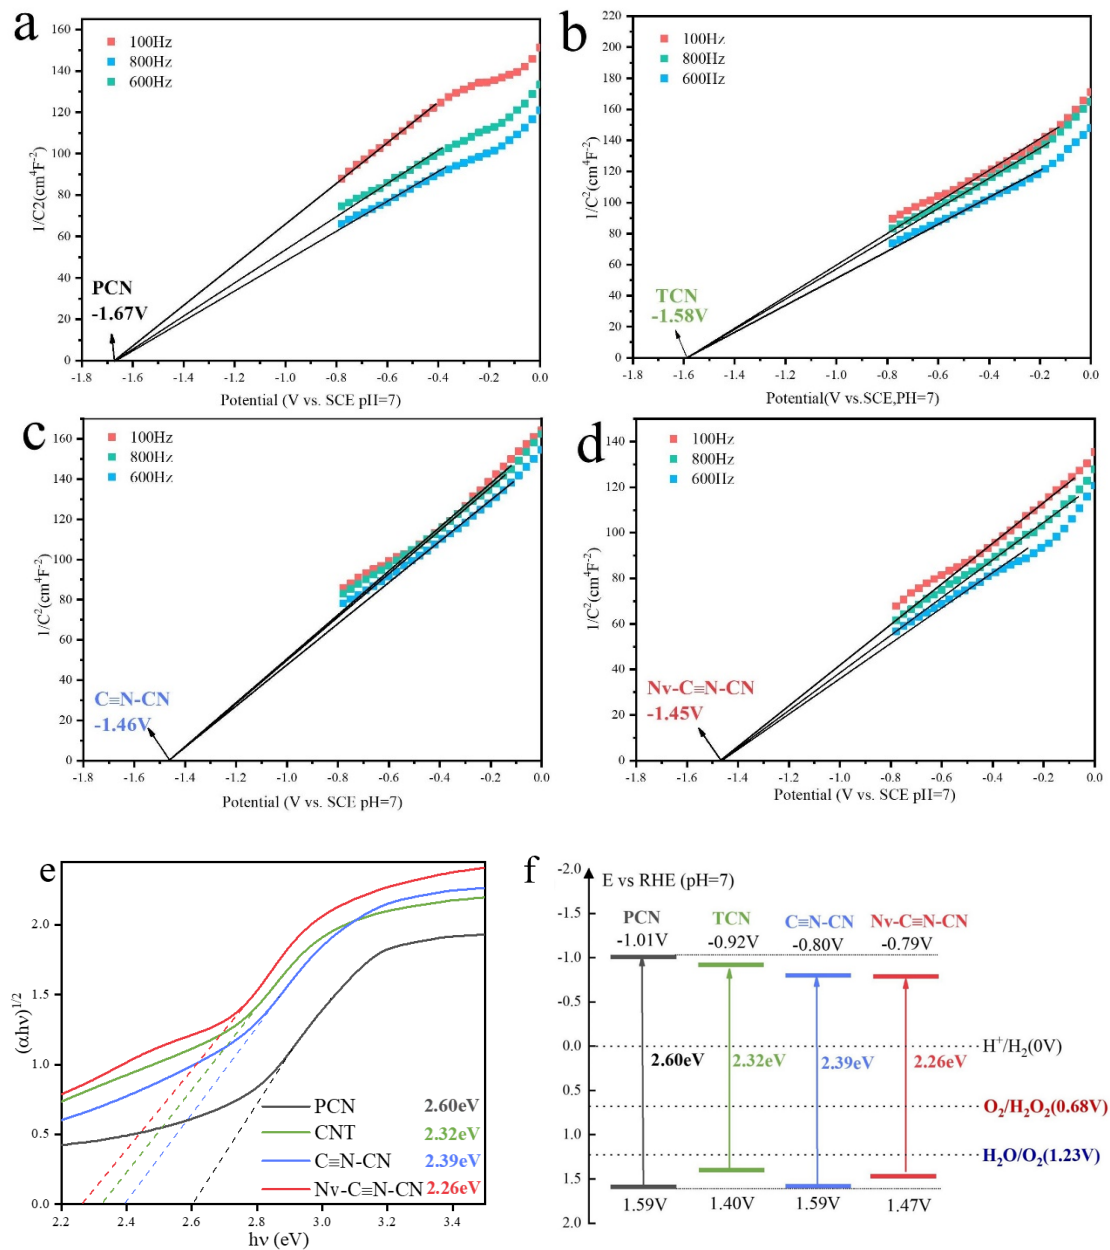

**Fig. S4** Mott-Schottky plots of (a) PCN, (b) TCN, (c) C≡N-CN, and (d) Nv-C≡N-CN.

(e) Plots of transformed Kubelka-Munk function versus photon energy of all samples.

(f) The schematic diagram of the band gap positions of the samples.



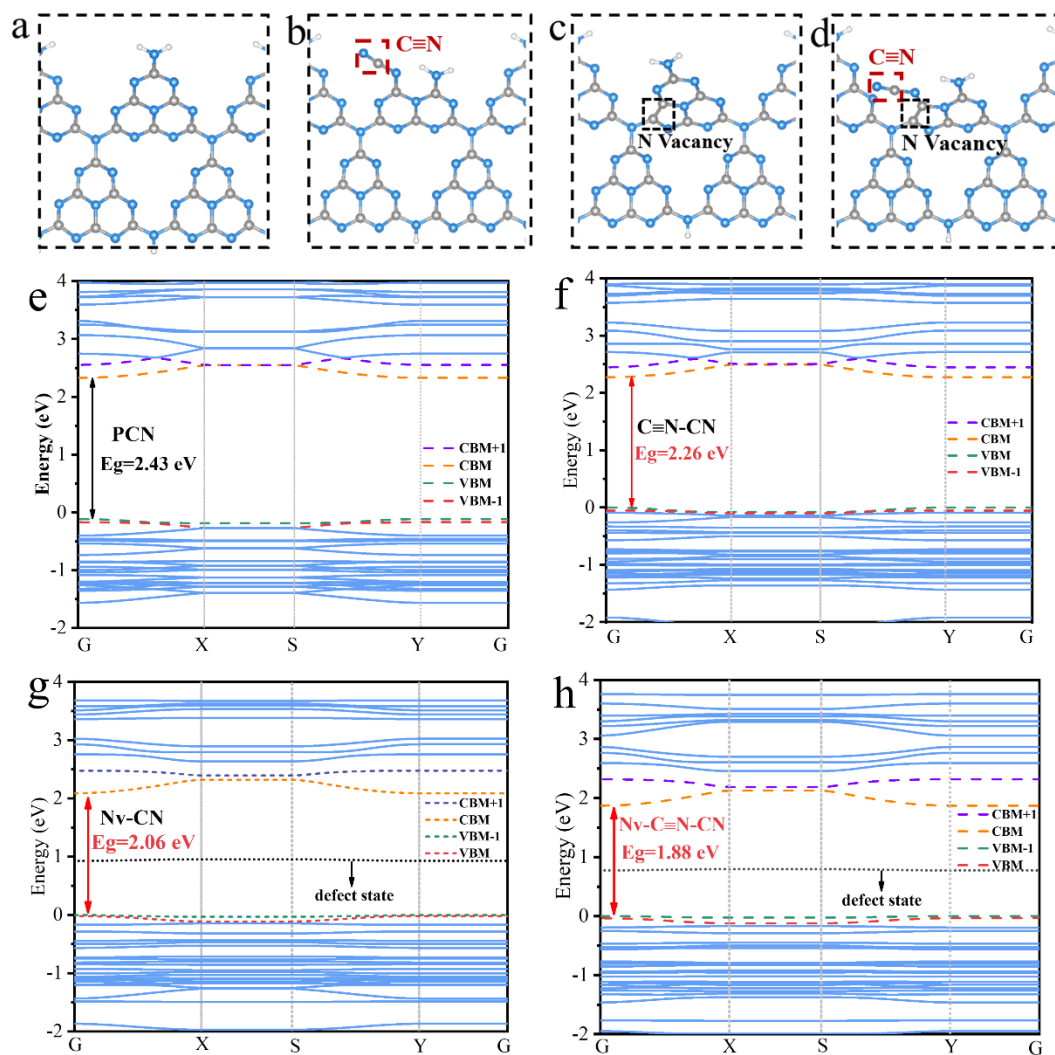

**Fig. S5** (a-d) The structural model of the four types of defect  $g\text{-C}_3\text{N}_4$  (PCN,  $\text{C}\equiv\text{N-CN}$ ,  $\text{Nv-CN}$ , and  $\text{Nv-C}\equiv\text{N-CN}$ ) and the corresponding (e-h) calculated band structure.

As shown in **Fig. S5b-c**, a  $\text{-C}\equiv\text{N}$  group and an  $\text{N}_{2\text{C}}$  vacancy is introduced into the  $g\text{-C}_3\text{N}_4$  unit cell, respectively, and the bandgap energy of  $\text{C}\equiv\text{N-CN}$  and  $\text{Nv-CN}$  is calculated. As shown in **Fig. S5e-g**, after the introduction of a  $\text{-C}\equiv\text{N}$  group and an N vacancy, the band gap of PCN decreased from 2.43 eV to 2.26 eV ( $\text{C}\equiv\text{N-CN}$ ) and 2.06 eV ( $\text{Nv-CN}$ ), respectively, indicating that both  $\text{-C}\equiv\text{N}$  groups and N vacancies can narrow the band gap. However, the introduction of  $\text{-C}\equiv\text{N}$  groups does not cause the

appearance of defect levels (**Fig. S5f**). The introduction of N vacancies brings defect levels (**Fig. S5g**). When the  $-C\equiv N$  group and the N vacancy coexist in the structure of  $g-C_3N_4$ , the band gap is reduced from 2.43 eV to 1.88 eV, indicating that the  $-C\equiv N$  groups and the N vacancies cooperate to narrow the band gap.

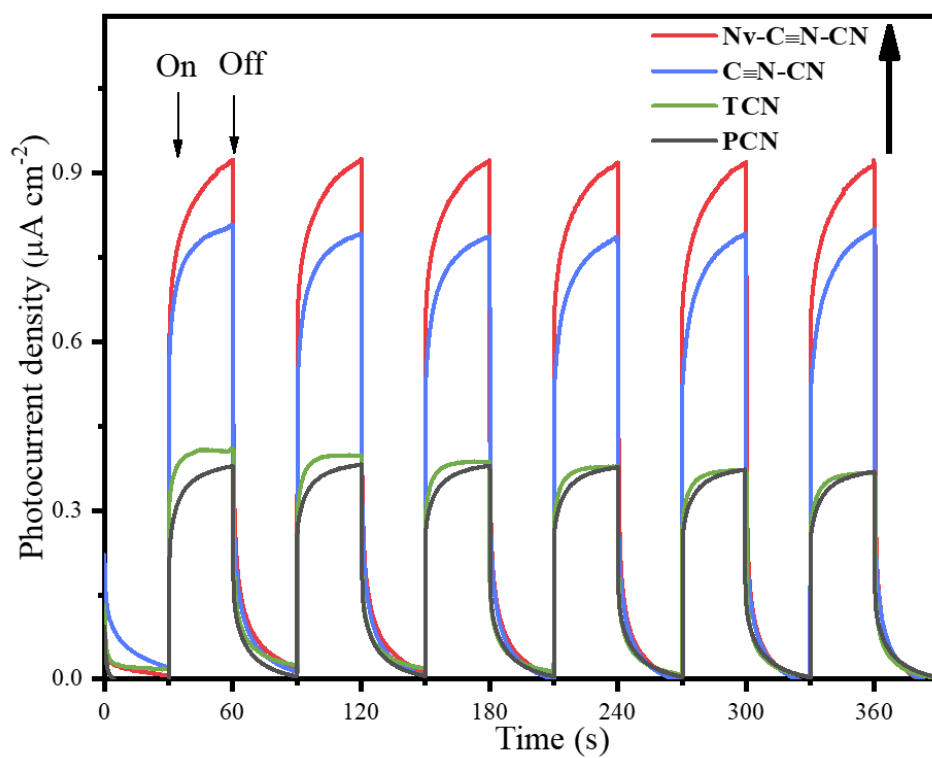

**Fig. S6** Transient photocurrent response (TPR) of all samples.

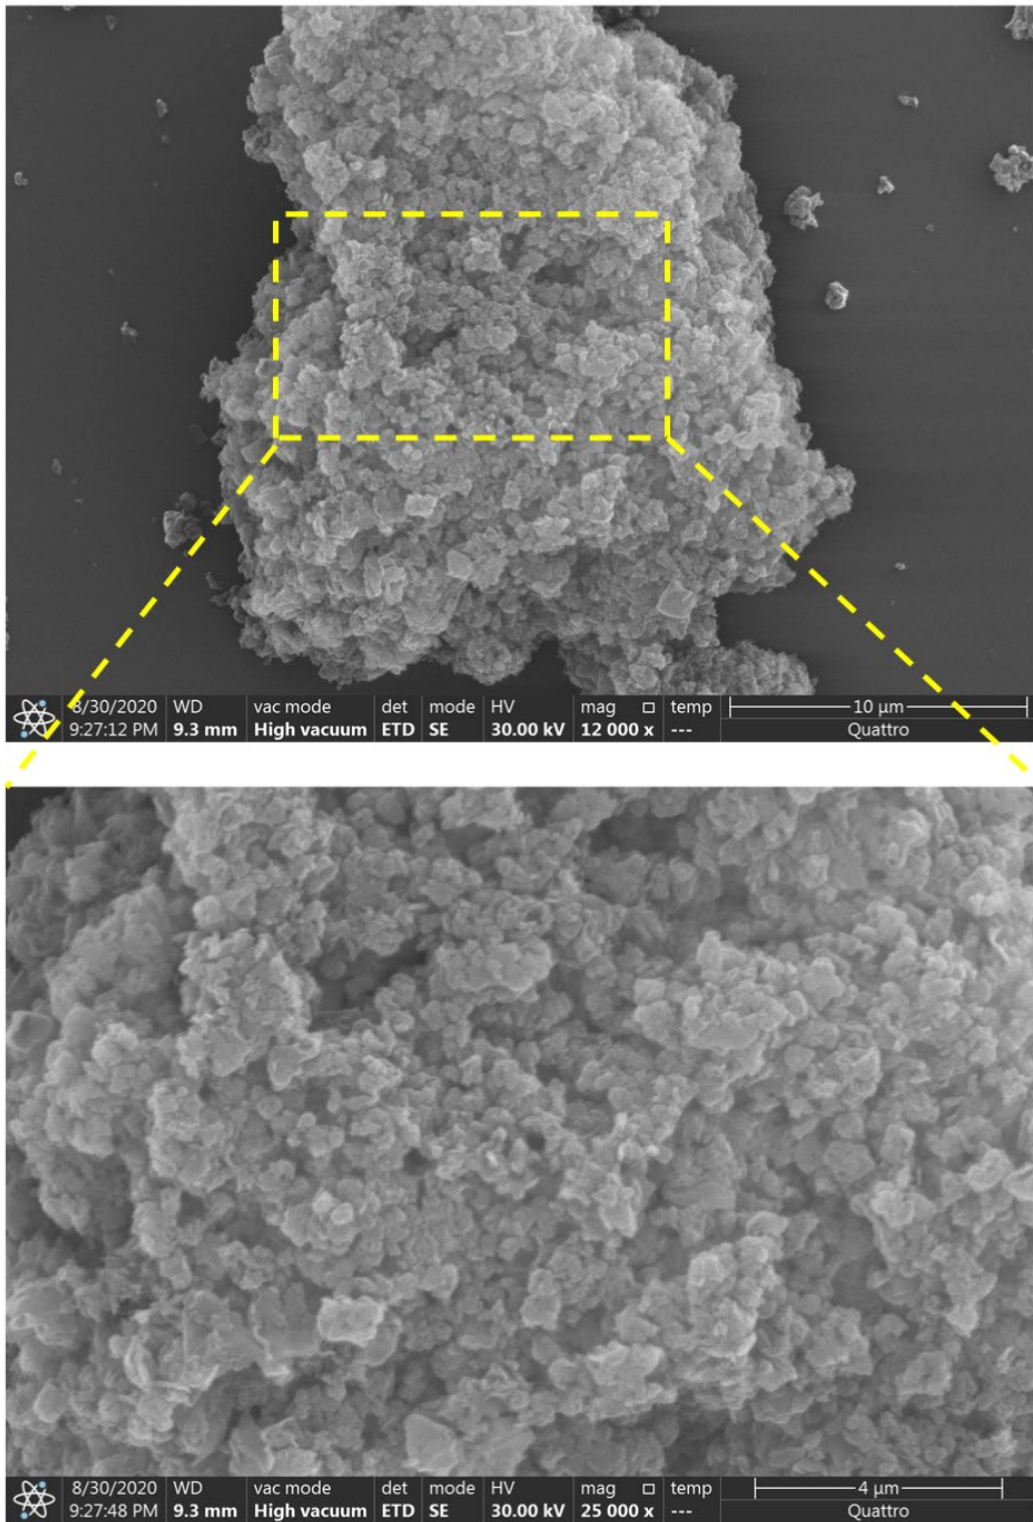

**Fig. S7** SEM images of PCN under different magnifications.

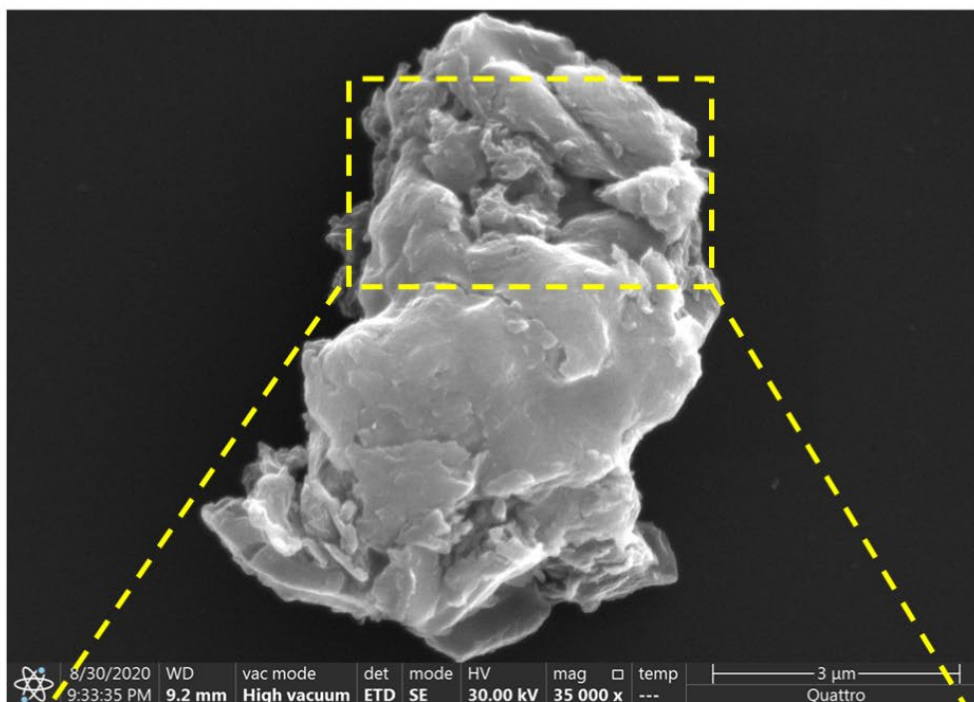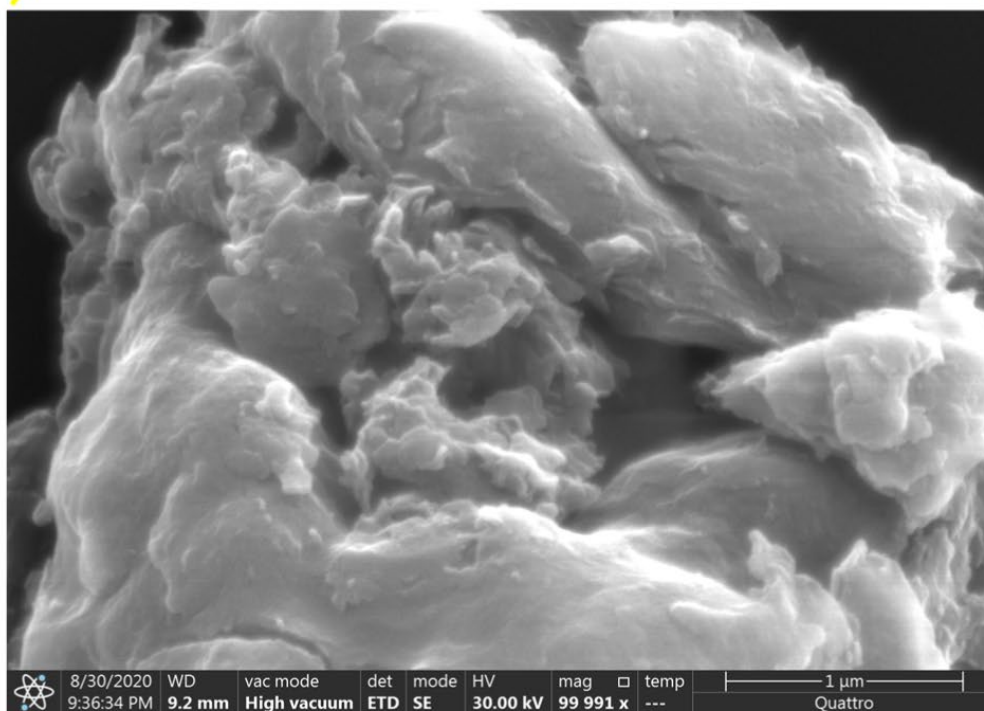

**Fig. S8** SEM images of TCN under different magnifications.

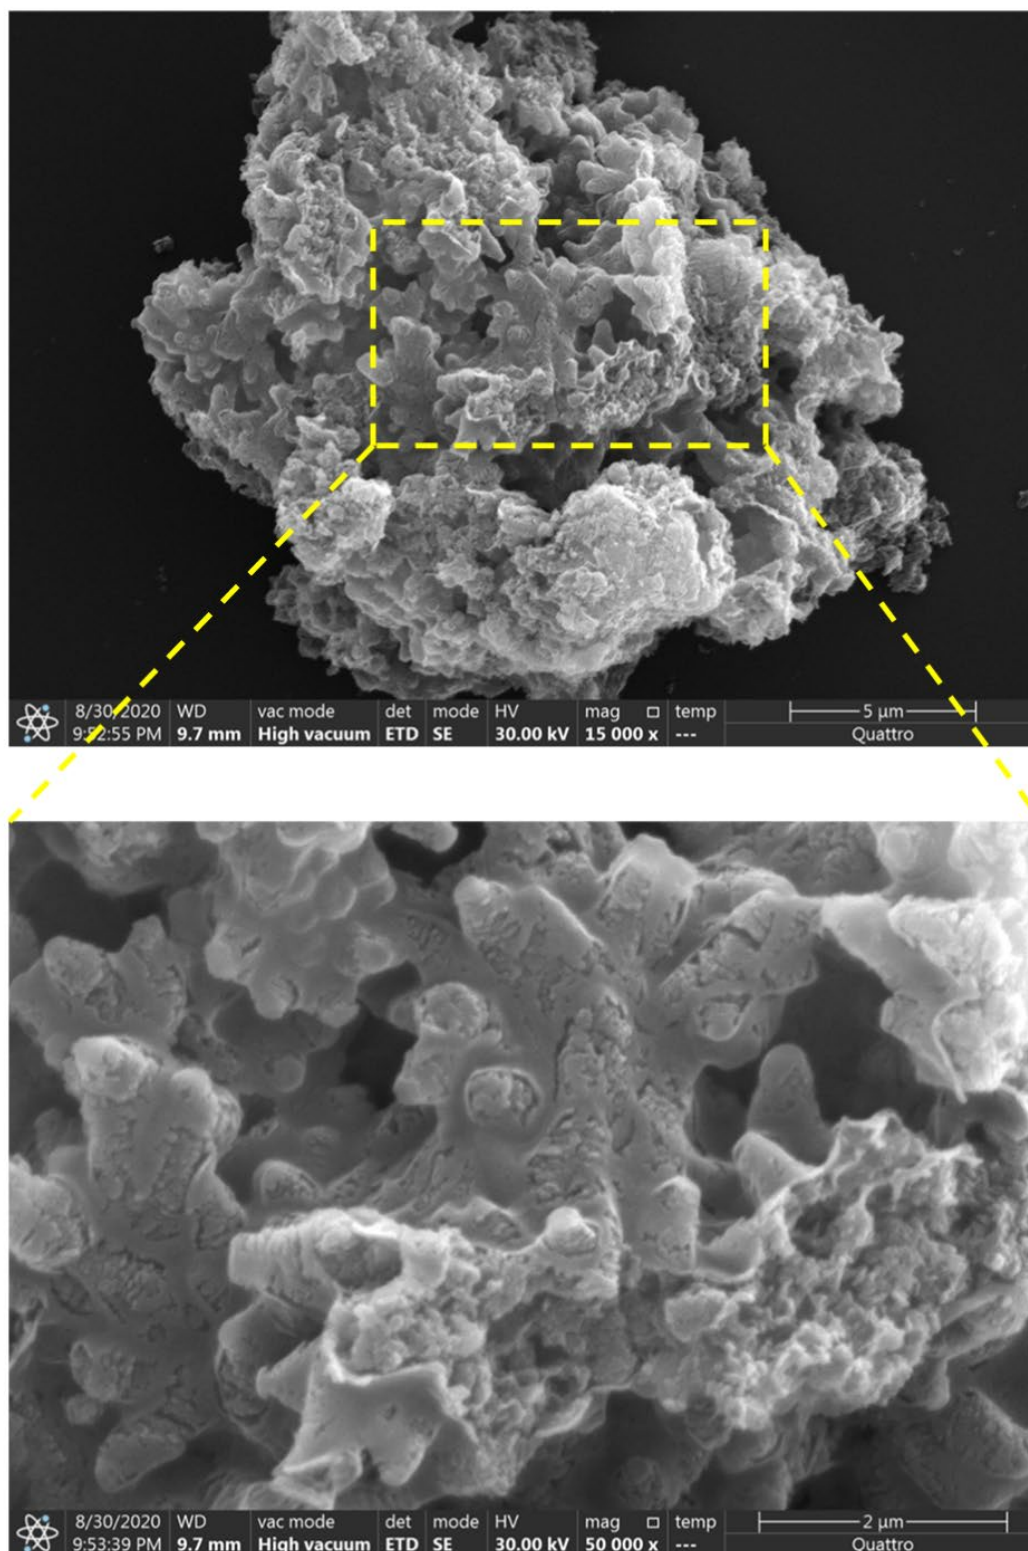

**Fig. S9** SEM images of  $C\equiv N-CN$  under different magnifications.



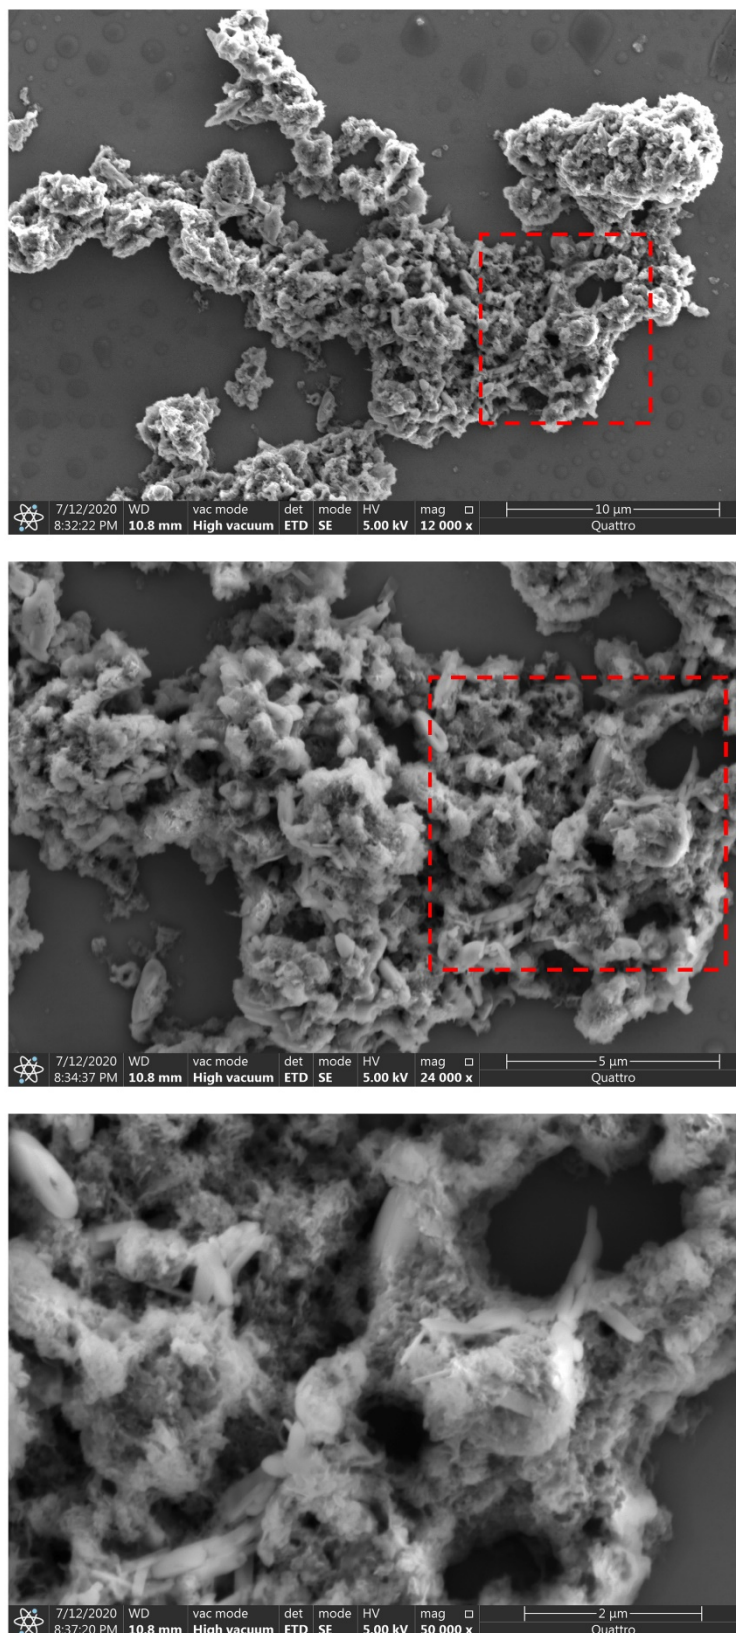

**Fig. S10** SEM images of Nv-C≡N-CN under different magnifications.

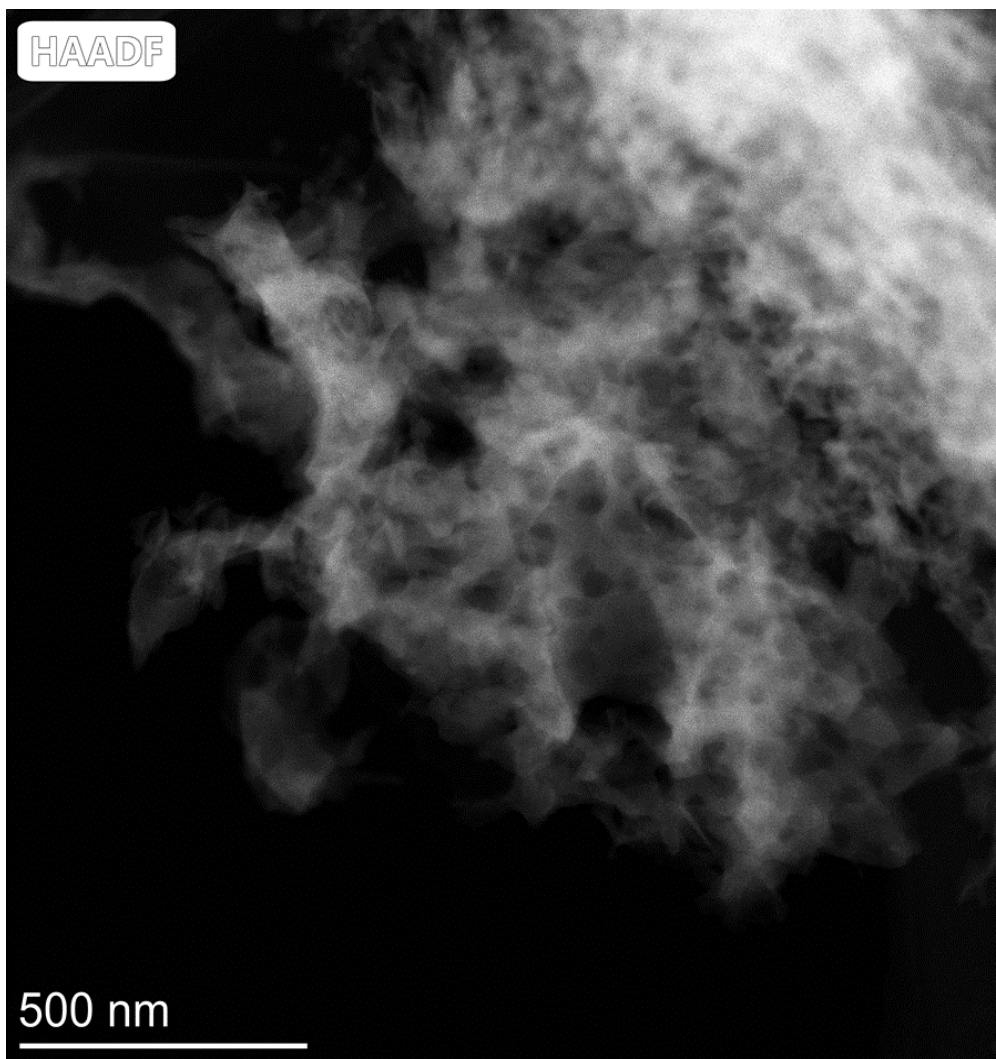

**Fig. S11** TEM image of Nv-C≡N-CN.

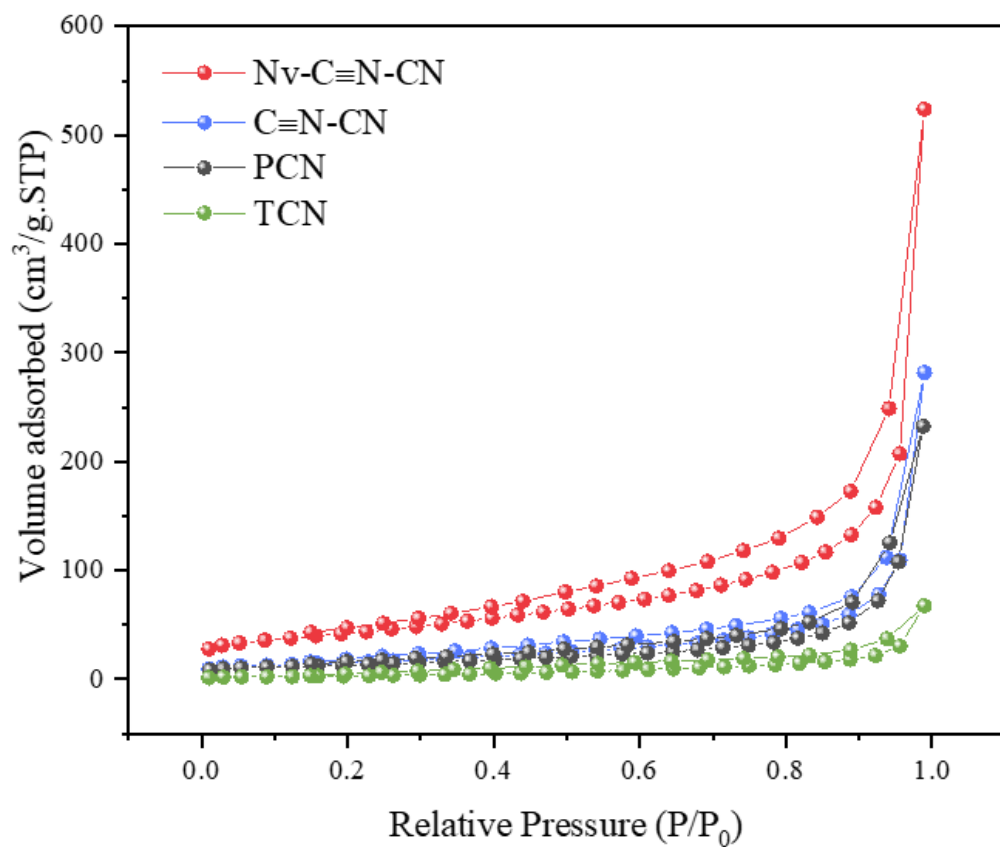

**Fig. S12** N<sub>2</sub> adsorption-desorption isotherms for PCN, TCN, C≡N-CN, and Nv-C≡N-CN.



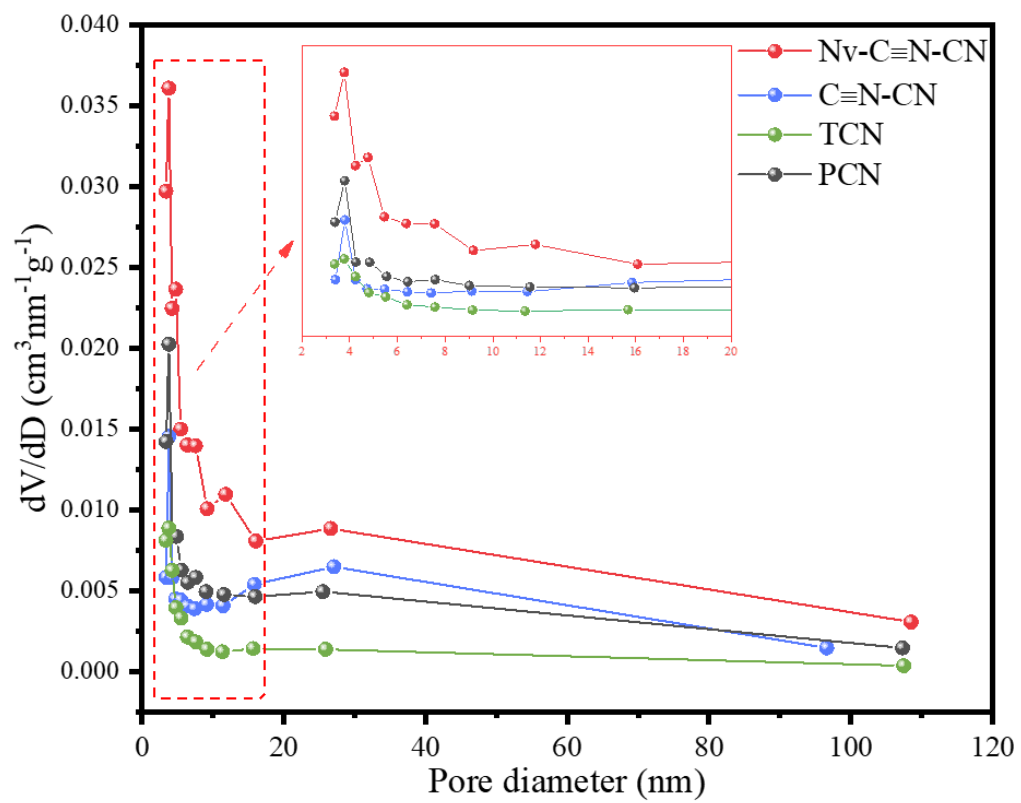

**Fig. S13** Pore size distribution curves for PCN, TCN, C≡N-CN, and Nv-C≡N-CN.

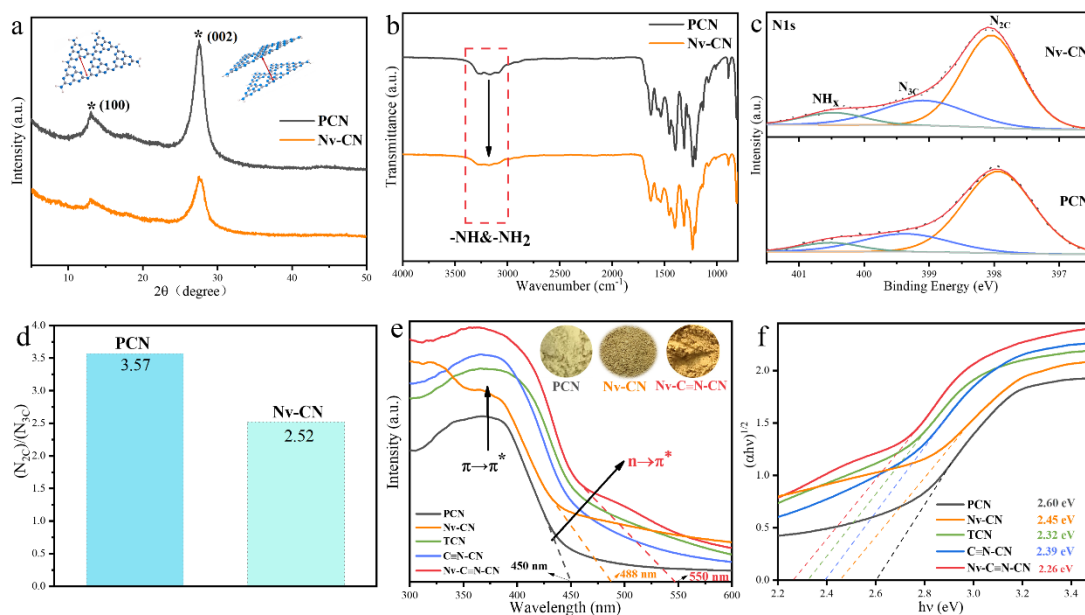

**Fig. S14** (a) XRD patterns and (b) FTIR spectra, and (c) N1s XPS spectra of PCN and Nv-CN. (d) The atomic ratio of N<sub>2C</sub>/N<sub>3C</sub> between PCN and Nv-CN calculated by N1s XPS spectra. (e) UV-vis DRS (the illustrations in **Fig. S14e** represent the colors of different samples) and (b) plots of transformed Kubelka-Munk function versus photon energy of all samples.

In **Fig. 2** of the manuscript and the corresponding discussion, it has been proved in detail that high-temperature etching of g-C<sub>3</sub>N<sub>4</sub> in an argon atmosphere leads to the appearance of N<sub>2C</sub> vacancies in the structure. Similarly, in **Fig. S14a**, compared with PCN, the two characteristic peaks of Nv-CN are weakened after high temperature etching. It shows that the argon treatment weakens the interlayer accumulation and affects the structural unit of g-C<sub>3</sub>N<sub>4</sub>. In FTIR (**Fig. S14b**), compared to PCN, the N-H bond stretching vibration of Nv-CN was slightly weaker, indicating that argon thermal

etching reduces the concentration of N-H bonds. Comparing the N1s of PCN and Nv-CN, it was found that the surface atomic ratio of  $N_{2C}/N_{3C}$  decreased from 3.57 to 2.52, which also proved the appearance of  $N_{2C}$  vacancies. The above characterization comprehensively proves the appearance of  $N_{2C}$  vacancies in Nv-CN, and it is in line with current literature reports.<sup>3,4</sup>

In **Fig. S14e**, after high temperature argon etching, the color of the sample changed from light yellow (PCN) to dark yellow (Nv-CN), and the red shift of the absorption edge can be clearly seen. This shows that the appearance of N vacancies expands the absorption range of visible light (from 450 nm of PCN to 488 nm of Nv-CN) and enhances the light absorption capacity. As shown in **Fig. S14e**, it is worth noting that Nv-CN has an obvious extended absorption tail, which is attributed to the  $n-\pi^*$  electronic transition caused by the lone pair of electrons at the N vacancies defect sites. Meanwhile, in **Fig. S14f**, the bandgap of PCN was narrowed from 2.60 eV to 2.45 eV of Nv-CN, indicating that the N vacancies can narrow the bandgap and adjust the band structure.

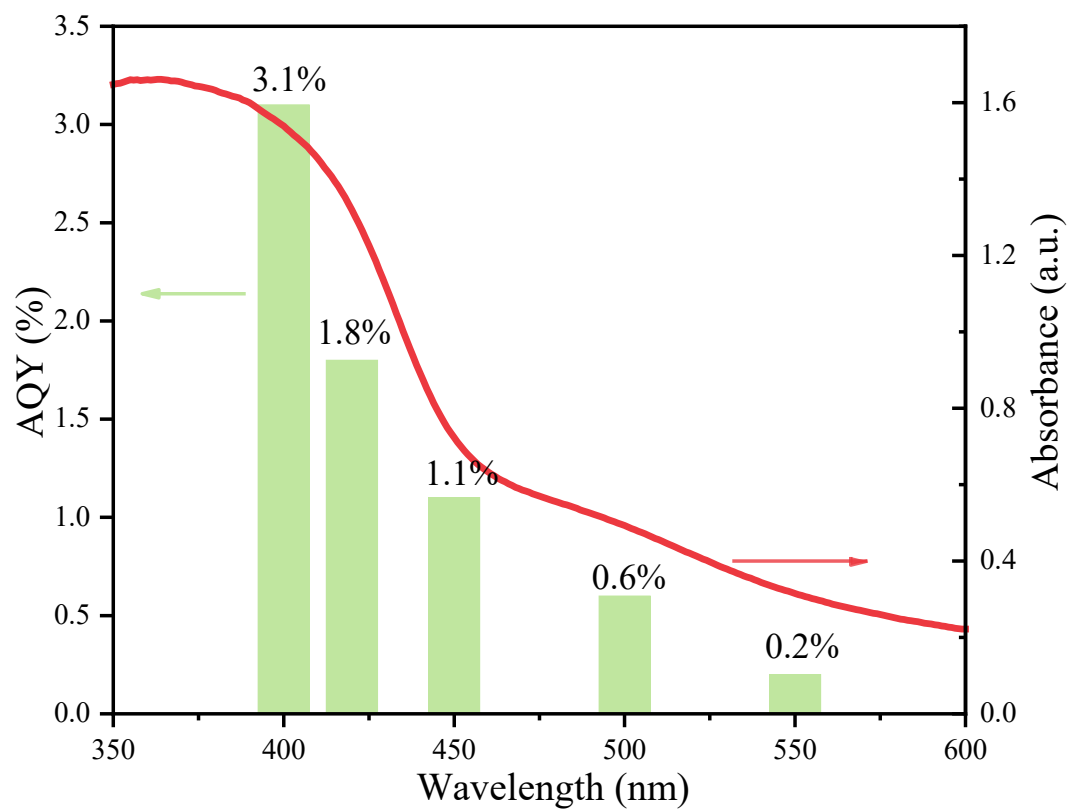

**Fig. S15** The wavelength-dependent AQY for photocatalytic H<sub>2</sub>O<sub>2</sub> generation by Nv-C≡N-CN (Conditions:  $\lambda \geq 420$  nm; pure water, pH=7; 1 g L<sup>-1</sup> catalyst).

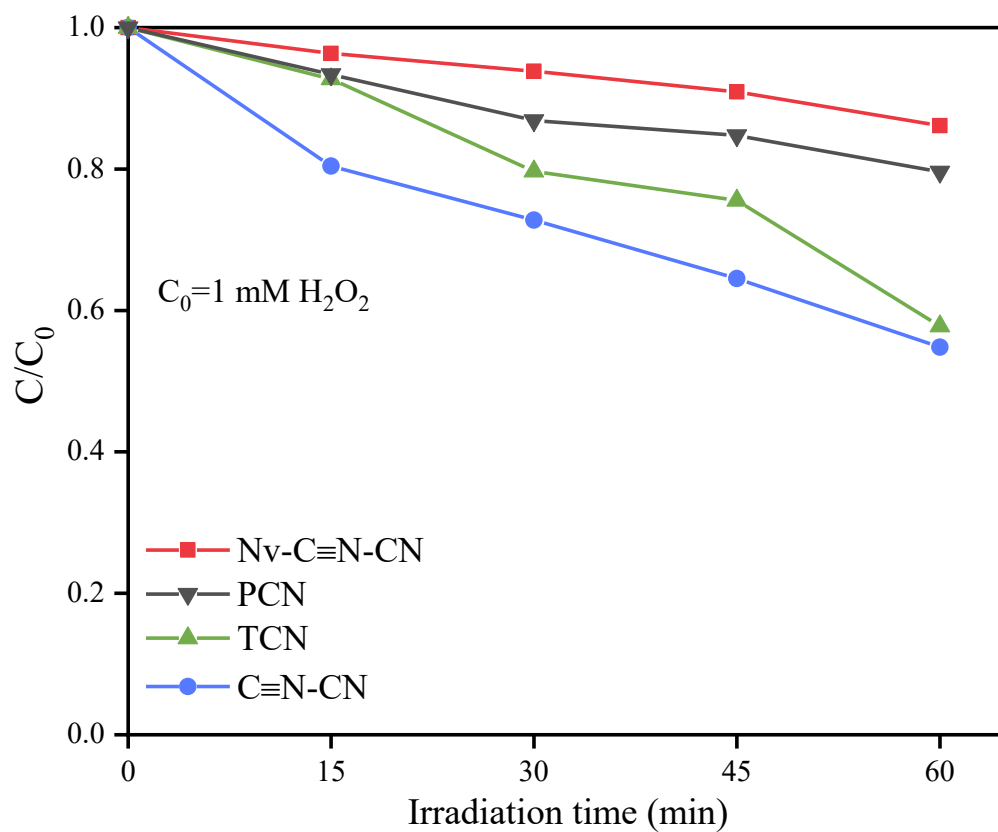

**Fig. S16** Photocatalytic decomposition of H<sub>2</sub>O<sub>2</sub> (1 mM) on different samples under visible light irradiation ( $\lambda \geq 420$  nm, 1 g L<sup>-1</sup> catalyst).

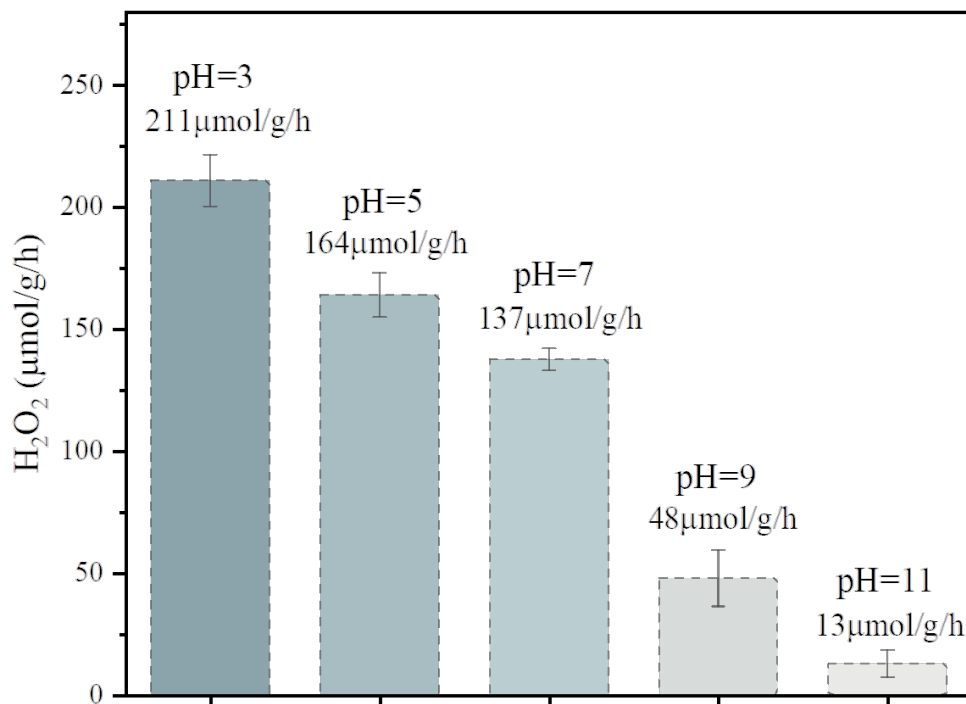

**Fig. S17** The influence of different pH in the reaction system on the photocatalytic  $\text{H}_2\text{O}_2$  generation rate of Nv-C $\equiv$ N-CN. Conditions:  $\lambda \geq 420$  nm, 1 g L<sup>-1</sup> catalyst.

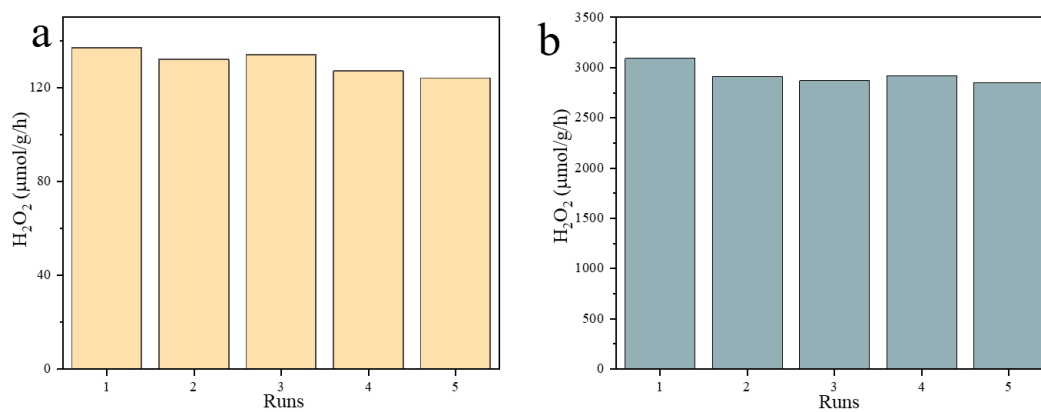

**Fig. S18** Cyclic test of photocatalytic  $\text{H}_2\text{O}_2$  generation over Nv-C $\equiv$ N-CN in (a) pure water (pH=7) and (b) sacrificial agent conditions (10% IPA, pH=3).

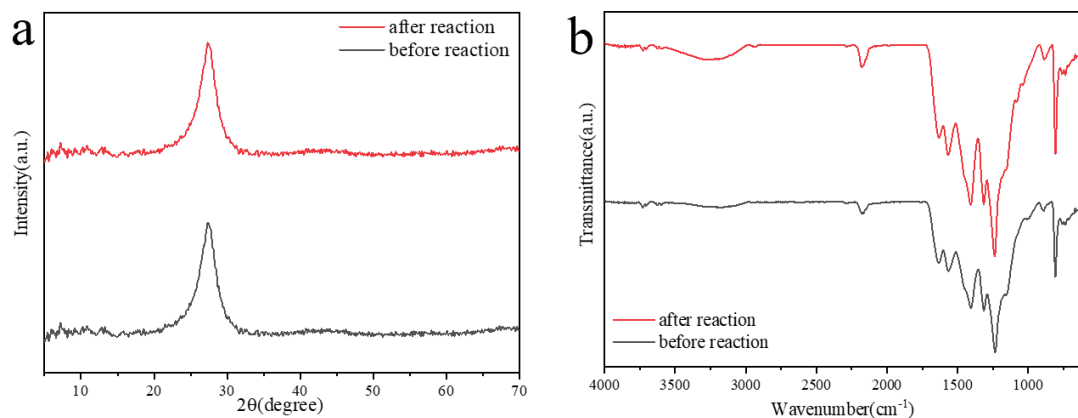

**Fig. S19** (a) XRD and (b) FTIR spectrum of Nv-C≡N-CN after the photocatalytic reaction.

As shown in **Fig. S19**, there is no obvious change in XRD and FTIR spectra of Nv-C≡N-CN before and after the photocatalytic reaction, which indicates that Nv-C≡N-CN has good stability in the photocatalytic H<sub>2</sub>O<sub>2</sub> generation reaction.

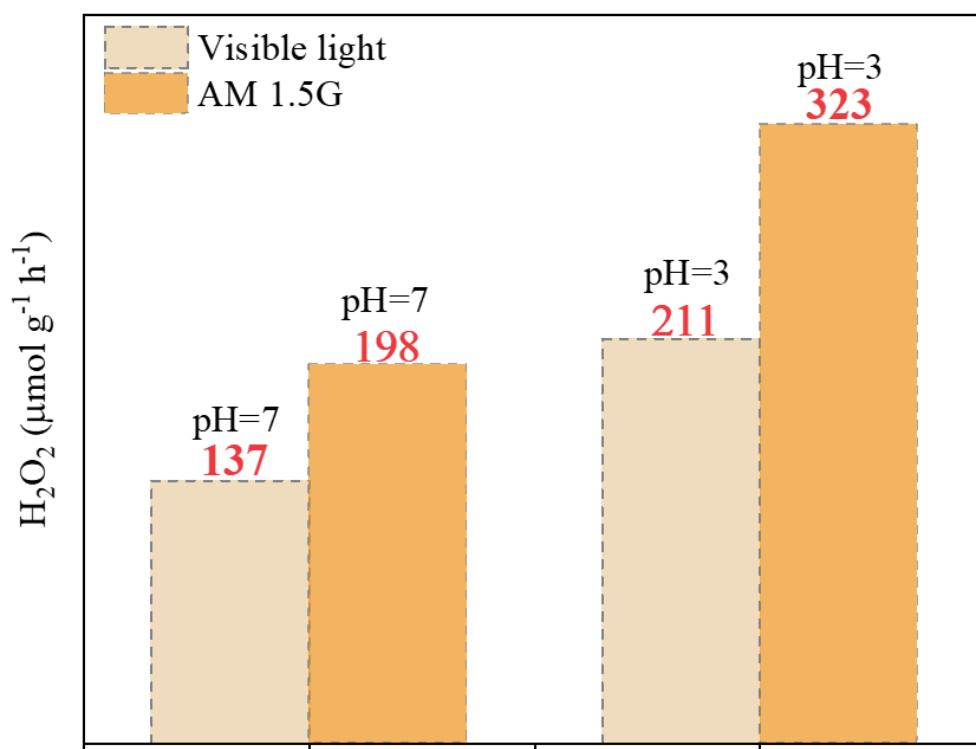

**Fig. S20** Comparison of H<sub>2</sub>O<sub>2</sub> generation rate of Nv-C≡N-CN under visible light ( $\lambda \geq 420$  nm) and AM 1.5G.



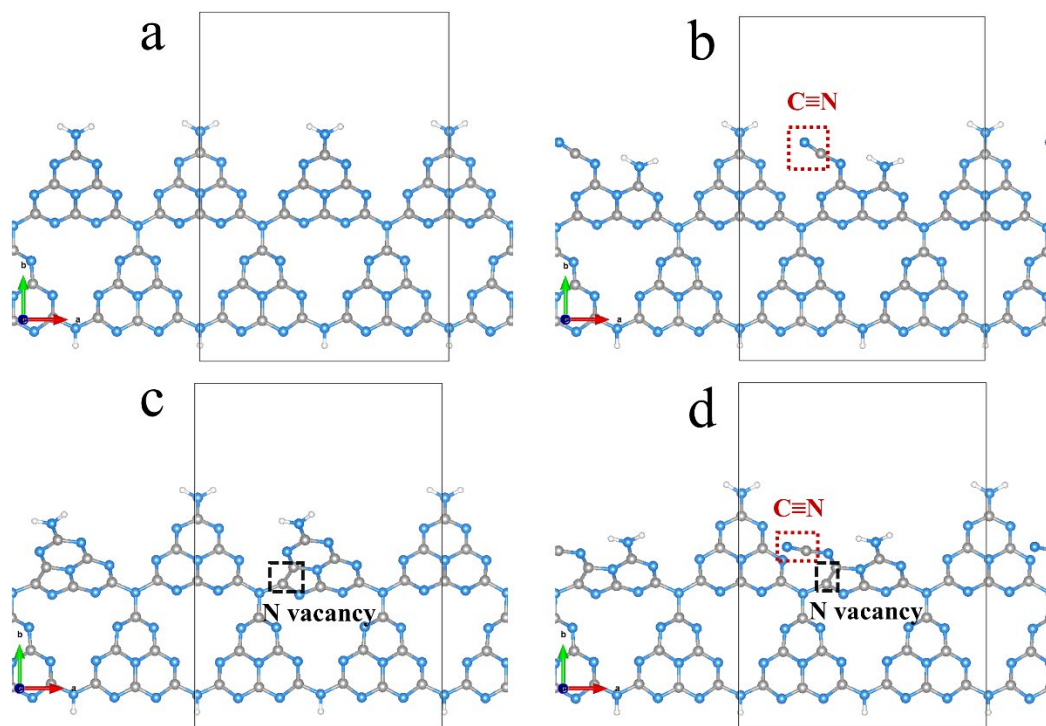

**Fig. S21.** The g-C<sub>3</sub>N<sub>4</sub> models with different defect structures (The blue, gray, and white spheres are represented by N, C, and H atoms, respectively).

As shown in **Fig. S21**, **Fig. S21a-d** represents PCN, C≡N-CN, Nv-CN, and Nv-C≡N-CN, respectively.

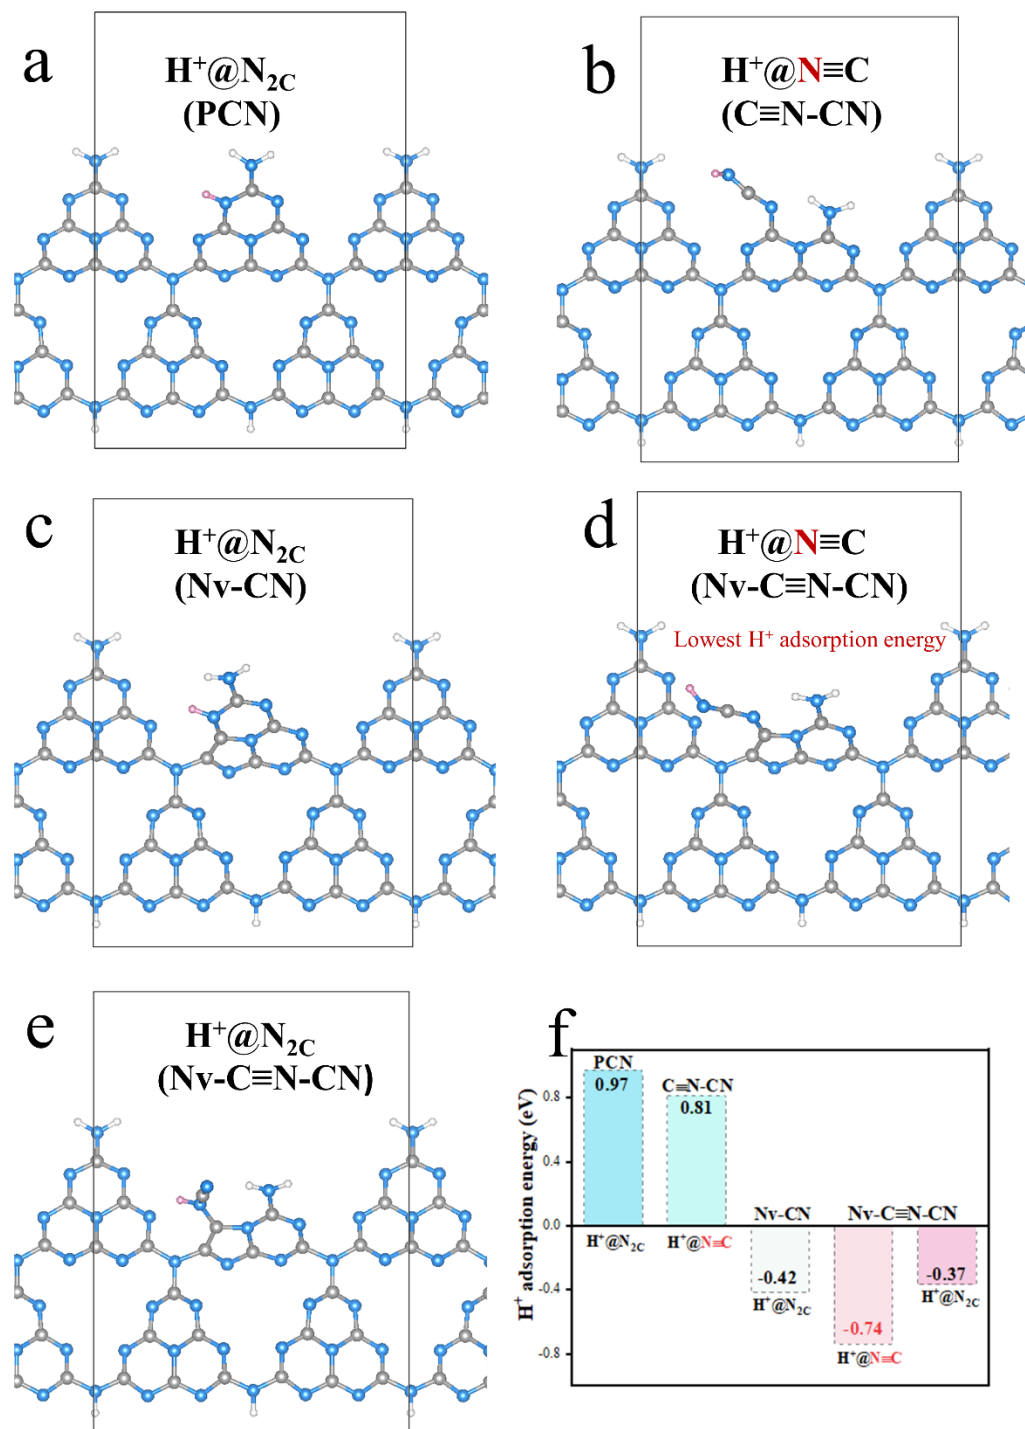

**Fig. S22** The position of  $\text{H}^+$  adsorption and the corresponding  $\text{H}^+$  adsorption energy on g- $\text{C}_3\text{N}_4$  models with different defect structures. The pink spheres in **Fig. S22** represent the adsorbed  $\text{H}^+$ , which can be distinguished from the H atoms (white spheres) in g- $\text{C}_3\text{N}_4$  structure.

For ease of illustration, the corresponding  $H^+$  adsorption energy was also organized in Figure S18f. As shown in **Fig. S22**, the  $H^+$  adsorption sites are all on the N atoms of  $g-C_3N_4$ . Among them,  $H^+$  is adsorbed on the  $N_{2C}$  atom in PCN, and then after the  $-C\equiv N$  groups appears,  $H^+$  is preferentially adsorbed on the N atom of  $-C\equiv N$  in  $C\equiv N-CN$ ; at the same time, the  $H^+$  adsorption energy is reduced from 0.97 to 0.81 eV (**Fig. S22f**), indicating that the  $-C\equiv N$  groups can effectively adsorb  $H^+$  in this reaction. On  $Nv-C\equiv N-CN$ ,  $H^+$  is adsorbed on the N atoms of the  $-C\equiv N$  groups and has the lowest  $H^+$  adsorption energy of -0.74 eV. We additionally simulated the adsorption of  $H^+$  on the  $N_{2C}$  position over  $Nv-C\equiv N-CN$  (**Fig. S22e**), and its adsorption energy was -0.37 eV. This comparison clearly shows that  $H^+$  is preferentially adsorbed at  $-C\equiv N$  on  $Nv-C\equiv N-CN$ .

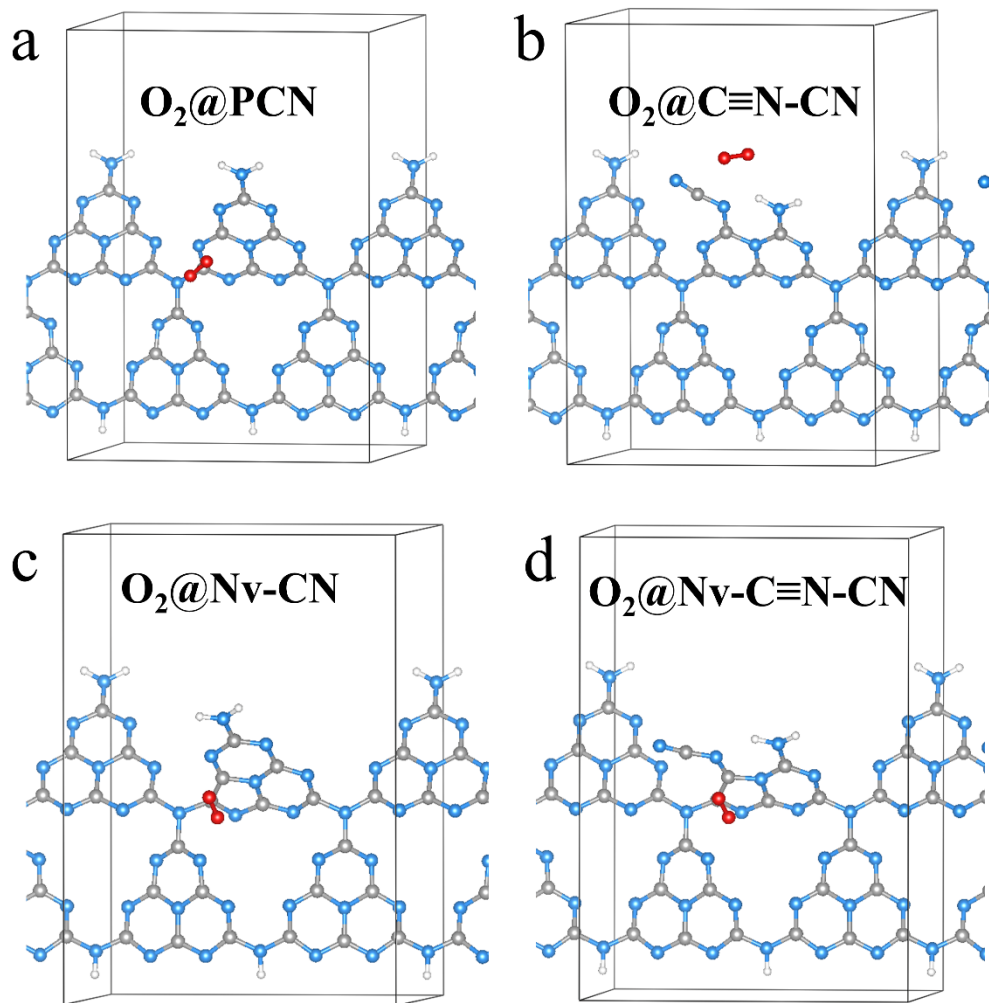

**Fig. S23** The  $O_2$  adsorption position on (a) PCN, (b)  $C\equiv N-CN$ , (c) Nv-CN, and (d) Nv- $C\equiv N-CN$ .

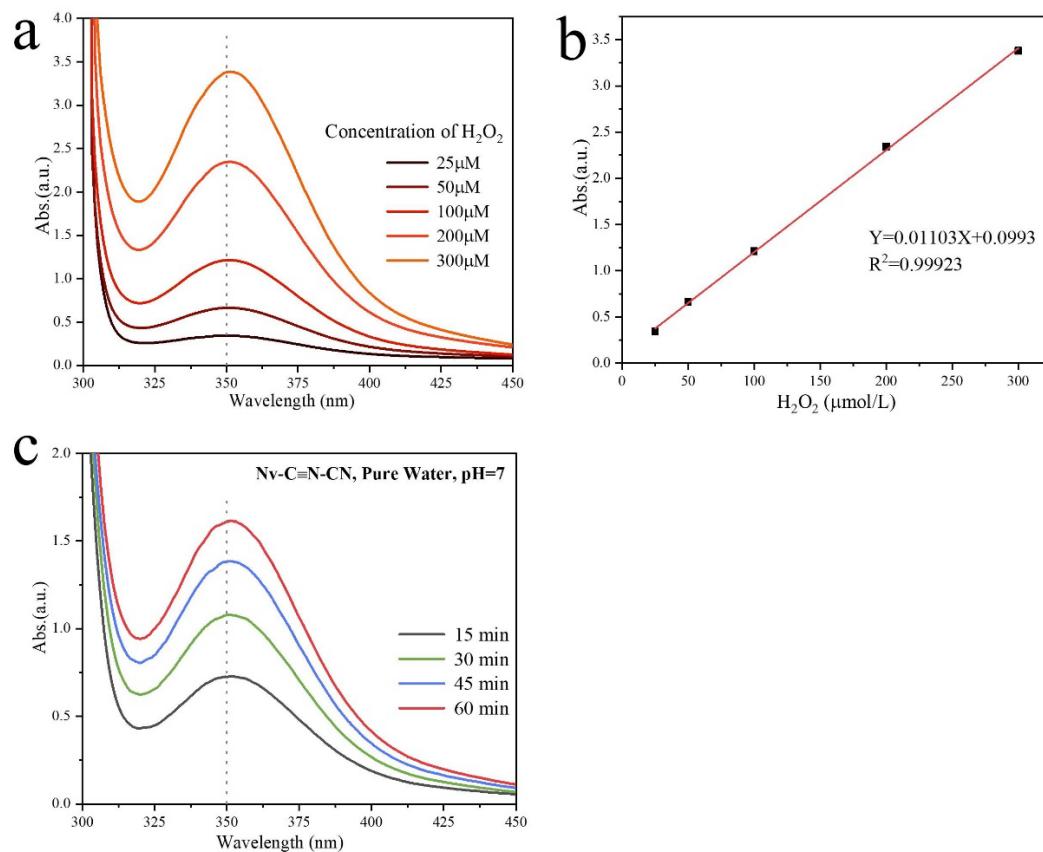

**Fig. S24** (a) Determination of UV-vis absorption intensity of different  $\text{H}_2\text{O}_2$  concentrations by iodimetry. (b) The linear fitting formula of standard  $\text{H}_2\text{O}_2$  concentration. (c) The UV-vis spectrum changes of  $\text{H}_2\text{O}_2$  generated by  $\text{Nv-C}\equiv\text{N-CN}$  in pure water under visible light ( $\lambda \geq 420$  nm,  $\text{pH}=7$ ).

### 3.2 Table S1-S9:

**Table S1.** XPS surface atoms ratio and N/C from OEA of C≡N-CN and Nv-C≡N-CN.

| Samples   | N/C         | N <sub>2c</sub> /C | N <sub>3c</sub> /C | NH <sub>x</sub> /C | N <sub>2c</sub> /N <sub>3c</sub> | N/C<br>(OEA) |
|-----------|-------------|--------------------|--------------------|--------------------|----------------------------------|--------------|
| C≡N-CN    | <b>1.05</b> | <b>0.76</b>        | 0.23               | 0.06               | <b>3.33</b>                      | 1.76056      |
| Nv-C≡N-CN | <b>0.73</b> | <b>0.37</b>        | 0.29               | 0.06               | <b>1.27</b>                      | 1.65645      |

**Table S2.** XPS data of all samples (the binding energy of different types of carbon and nitrogen in C1s and N1s).

| Samples   | N-C=N | C≡N/<br>C-NH <sub>x</sub> | C-C/C=C | NH <sub>x</sub> | N <sub>3c</sub> | N <sub>2c</sub> |
|-----------|-------|---------------------------|---------|-----------------|-----------------|-----------------|
| PCN       | 288.5 | 286.4                     | 284.8   | 401.5           | 400.3           | 398.9           |
| TCN       | 288.4 | 286.4                     | 284.8   | 401.5           | 400.4           | 398.9           |
| C≡N-CN    | 288.5 | 286.5                     | 284.8   | 401.5           | 400.3           | 398.9           |
| Nv-C≡N-CN | 288.5 | 286.4                     | 284.8   | 401.5           | 400.1           | 398.9           |

**Table S3.** TRPL date of the samples.

| Samples                         | $\tau_1/\text{ns}$ ( $A_1$ ) | $\tau_2/\text{ns}$ ( $A_2$ ) | $\tau_3/\text{ns}$ ( $A_3$ ) | $\tau_A/\text{ns}^a$ |
|---------------------------------|------------------------------|------------------------------|------------------------------|----------------------|
| PCN                             | 1.25(27.99%)                 | 4.87(50.72%)                 | 28.10(21.29%)                | 8.80                 |
| TCN                             | 0.83(26.22%)                 | 3.94(47.63%)                 | 19.92(26.15%)                | 7.31                 |
| C $\equiv$ N-CN                 | 0.85(29.16%)                 | 4.17(49.12%)                 | 21.97(21.72%)                | 7.07                 |
| N <sub>v</sub> -C $\equiv$ N-CN | 0.59(24.68%)                 | 3.51(47.40%)                 | 17.27(27.93)                 | 6.63                 |

<sup>a</sup> The calculation formula of the average TRPL lifetime is:  $\tau_A = \frac{\sum A_i \tau_i}{\sum A_i}$ , where  $\tau_i$  is the time coefficient and  $A_i$  is the corresponding amplitude of each component.

**Table S4.** BET specific surface areas ( $\text{m}^2 \text{g}^{-1}$ ) of the samples

| Samples                            | PCN  | TCN  | C $\equiv$ N-CN | N <sub>v</sub> -C $\equiv$ N-CN |
|------------------------------------|------|------|-----------------|---------------------------------|
| BET ( $\text{m}^2 \text{g}^{-1}$ ) | 55.0 | 11.4 | 46.9            | 150.5                           |

**Table S5.** The wavelength-dependent AQY for photocatalytic H<sub>2</sub>O<sub>2</sub> generation by Nv-C≡N-CN.<sup>a</sup>

|                                                |       |       |       |       |       |
|------------------------------------------------|-------|-------|-------|-------|-------|
| Wavelength (nm)                                | 400   | 420   | 450   | 500   | 550   |
| H <sub>2</sub> O <sub>2</sub> evolution (μmol) | 2.241 | 1.645 | 0.745 | 0.588 | 0.210 |
| Light intensity (mWcm <sup>-2</sup> )          | 12    | 14.5  | 10.2  | 12.6  | 14.8  |
| Irradiation area (cm <sup>2</sup> )            | 1.69  | 1.69  | 1.69  | 1.69  | 1.69  |
| Irradiation time (h)                           | 1     | 1     | 1     | 1     | 1     |
| AQY (%)                                        | 3.1   | 1.8   | 1.1   | 0.6   | 0.2   |

<sup>a</sup> Conditions: λ ≥ 420 nm; pure water, pH=7; 1 g L<sup>-1</sup> catalyst.

**Table S6.** SCC of the photocatalytic H<sub>2</sub>O<sub>2</sub> generation by Nv-C≡N-CN under AM 1.5G simulated sunlight.<sup>a</sup>

| H <sub>2</sub> O <sub>2</sub> evolution (μmol) | Light intensity (mW/cm <sup>2</sup> ) | Irradiation area (cm <sup>2</sup> ) | Irradiation time (h) | SCC (%) |
|------------------------------------------------|---------------------------------------|-------------------------------------|----------------------|---------|
| 7.077                                          | 100                                   | 1                                   | 1                    | 0.23    |

<sup>a</sup> Conditions: λ ≥ 420 nm; pure water, pH=7; 1 g L<sup>-1</sup> catalyst.

SCC:

$$\text{SCC} = \frac{[\Delta G_{\text{H}_2\text{O}_2}] \times [n_{\text{H}_2\text{O}_2}]}{I \times S \times T} \times 100\% = \frac{117 \times 10^3 \times 7.077 \times 10^{-6}}{100 \times 1 \times 10^{-3} \times 3600} \times 100\% = 0.23\%$$



**Table S7.** The wavelength-dependent AQY for photocatalytic H<sub>2</sub>O<sub>2</sub> generation by Nv-C≡N-CN. Conditions: λ ≥ 420 nm, 10% IPA, pH=3, 1 g L<sup>-1</sup> catalyst.

|                                                |        |        |       |       |       |
|------------------------------------------------|--------|--------|-------|-------|-------|
| Wavelength (nm)                                | 400    | 420    | 450   | 500   | 550   |
| H <sub>2</sub> O <sub>2</sub> evolution (μmol) | 26.137 | 20.245 | 8.768 | 6.539 | 1.347 |
| Light intensity (mW cm <sup>-2</sup> )         | 12     | 14.5   | 10.2  | 12.6  | 14.8  |
| Irradiation area (cm <sup>2</sup> )            | 1.69   | 1.69   | 1.69  | 1.69  | 1.69  |
| Irradiation time (h)                           | 1      | 1      | 1     | 1     | 1     |
| AQY (%)                                        | 36.2   | 22.1   | 12.7  | 6.9   | 1.1   |

**λ=400 nm:**

$$\text{The number of incident photons: } N = \frac{E\lambda}{h\nu} = \frac{12 \times 10^{-3} \times 3600 \times 400 \times 10^{-9}}{6.626 \times 10^{-34} \times 3 \times 10^8} = 8.69303 \times 10^{19}$$

$$\text{AQY} = \frac{2 \times \text{H}_2\text{O}_2 \text{ formed (mol)}}{\text{the number of incident photons (mol)}} \times 100 \% = \frac{2 \times 26.137 \times 10^{-6} \times 6.02 \times 10^{23}}{8.69303 \times 10^{19}} \times 100 \% =$$

36.2%

**λ=420 nm:**

$$\text{The number of incident photons: } N = \frac{E\lambda}{h\nu} = \frac{14.5 \times 10^{-3} \times 3600 \times 420 \times 10^{-9}}{6.626 \times 10^{-34} \times 3 \times 10^8} = 1.10293 \times 10^{20}$$

$$\text{AQY} = \frac{2 \times \text{H}_2\text{O}_2 \text{ formed (mol)}}{\text{the number of incident photons (mol)}} \times 100 \% = \frac{2 \times 20.245 \times 10^{-6} \times 6.02 \times 10^{23}}{1.10293 \times 10^{20}} \times 100 \% =$$

22.1%

**Table S8.** Summary of g-C<sub>3</sub>N<sub>4</sub>-based materials for photocatalytic H<sub>2</sub>O<sub>2</sub> generation activity. The experimental system is subdivided into different pH, with or without sacrificial agent (EtOH is ethanol and IPA is isopropanol in this table), and different light intensity. The standardized yield of H<sub>2</sub>O<sub>2</sub> (μmol/g/h), AQY, and SCC are used as evaluation indicators.

| Catalysts                                                       | Sacrificial Reagent         | Light Source    | H <sub>2</sub> O <sub>2</sub> yields (μmol/g/h) | AQY                                  | SCC          | Ref |
|-----------------------------------------------------------------|-----------------------------|-----------------|-------------------------------------------------|--------------------------------------|--------------|-----|
| <b>Nv-C≡N-CN<br/>(This work)</b>                                | <b>Pure water,<br/>pH=7</b> | <b>λ≥420 nm</b> | <b>137</b>                                      | <b>3.1%(400nm)<br/>1.8%(420nm)</b>   | <b>0.23%</b> |     |
|                                                                 |                             | <b>AM 1.5G</b>  | <b>198</b>                                      | /                                    |              |     |
|                                                                 | <b>Pure water,<br/>pH=3</b> | <b>λ≥420 nm</b> | <b>211</b>                                      | /                                    |              |     |
|                                                                 |                             | <b>AM 1.5G</b>  | <b>323</b>                                      |                                      |              |     |
|                                                                 | <b>10% IPA,<br/>pH=3</b>    | <b>λ≥420 nm</b> | <b>3093</b>                                     | <b>36.2%(400nm)<br/>22.1%(420nm)</b> |              |     |
|                                                                 |                             | <b>AM 1.5G</b>  | <b>3930</b>                                     | /                                    |              |     |
| CN <sub>4</sub>                                                 | 10% IPA                     | λ≥420 nm        | 574                                             | 13.9% (420 nm)                       |              | 5   |
| CO/AQ/C <sub>3</sub> N <sub>4</sub>                             | Pure water                  | AM 1.5G         | 124                                             | 0.051%                               | 0.014%       | 6   |
| PEI/g-C <sub>3</sub> N <sub>4</sub>                             | Pure water                  | AM 1.5G         | 208.1                                           | 2.1% (420nm)                         | 0.045%       | 7   |
| ZnPPC-NBCN                                                      | Pure water                  | λ≥420 nm        | 114                                             | /                                    | 0.13%        | 8   |
| Ag@U-g-C <sub>3</sub> N <sub>4</sub>                            | Pure water,<br>pH=3         | λ≥420 nm        | 70                                              | /                                    | /            | 9   |
| CTF-BDDBN                                                       | Pure water                  | λ≥420 nm        | 97                                              | /                                    | /            | 10  |
| CN/RGO@BPQDs                                                    | Pure water<br>pH=6.5        | λ≥420 nm        | 60.6                                            | /                                    | /            | 11  |
| P-Mmcns-25                                                      | 5% EtOH                     | AM 1.5G         | 1083                                            | 0.045%(420nm)                        | /            | 12  |
| AKMT                                                            | 10% IPA                     | λ≥420 nm        | 2733                                            | 70% (420nm)                          | /            | 13  |
| RF523                                                           | Pure water                  | λ≥420 nm        | 52                                              | 8%(420nm)                            | 0.5%         | 14  |
| OCN                                                             | Pure water                  | λ≥420 nm        | 105                                             | /                                    | /            | 1   |
|                                                                 | 10% IPA                     | λ≥420 nm        | 1200                                            | 10.2%(420nm)                         | /            |     |
| DCN                                                             | 20% IPA                     | λ≥420 nm        | 96.8                                            | 10.7%(420nm)                         | /            | 15  |
| Ti <sub>2</sub> C <sub>3</sub> -g-C <sub>3</sub> N <sub>4</sub> | 10% IPA                     | λ≥420 nm        | 131.71                                          | /                                    | /            | 16  |
| K <sub>2</sub> HPO <sub>4</sub> /GCN                            | 10% EtOH                    | λ≥420 nm        | 505                                             | /                                    | /            | 17  |
| Mesoporous g-C <sub>3</sub> N <sub>4</sub>                      | 90% EtOH                    | λ≥420 nm        | 183.5                                           | /                                    | /            | 18  |
| 3DM-g-C <sub>3</sub> N <sub>4</sub> -PW <sub>11</sub>           | Pure water                  | λ≥320 nm        | 35                                              | /                                    | /            | 19  |

|                                                     |            |                       |        |               |      |    |
|-----------------------------------------------------|------------|-----------------------|--------|---------------|------|----|
| g-C <sub>3</sub> N <sub>4</sub> /BDI                | Pure water | $\lambda \geq 420$ nm | 9.6    | 2.6%(420nm)   | /    | 20 |
| Cv-g-C <sub>3</sub> N <sub>4</sub>                  | Pure water | $\lambda \geq 420$ nm | 92     | /             | /    | 21 |
| G-CN-PWO                                            | Pure water | $\lambda \geq 420$ nm | 60     | /             | /    | 22 |
| g-C <sub>3</sub> N <sub>4</sub> /PDI/rGO            | Pure water | $\lambda \geq 420$ nm | 24.1   | /             | 0.2% | 23 |
| BP/CN                                               | 10% IPA    | $\lambda \geq 420$ nm | 540    | /             | /    | 24 |
| SS-CN                                               | 10% IPA    | $\lambda \geq 420$ nm | 566.69 | /             | /    | 25 |
| g-C <sub>3</sub> N <sub>4</sub> /PDI <sub>151</sub> | Pure water | $\lambda \geq 420$ nm | 21     | /             | /    | 26 |
| KOH- g-C <sub>3</sub> N <sub>4</sub>                | 10% IPA    | $\lambda \geq 420$ nm | 704    | /             | /    | 27 |
| IO-CN-Cv                                            | 5% EtOH    | $\lambda \geq 420$ nm | 162.87 | /             | /    | 28 |
| Ultra-thin g-C <sub>3</sub> N <sub>4</sub>          | 10% EtOH   | $\lambda \geq 420$ nm | 43     | 0.54% (420nm) | /    | 29 |

**Table S9.** The O-O bond-length of adsorbed O<sub>2</sub> on various g-C<sub>3</sub>N<sub>4</sub>.<sup>a</sup>

| O <sub>2</sub> adsorption position | PCN      | C $\equiv$ N-CN | Nv-CN    | Nv-C $\equiv$ N-CN |
|------------------------------------|----------|-----------------|----------|--------------------|
| O-O bond-length                    | 1.2432 Å | 1.2397 Å        | 1.2563 Å | 1.2546 Å           |

<sup>a</sup> The O-O bond-length of free O<sub>2</sub> is 1.2075 Å.

#### 4. Reference

1. Z. Wei, M. Liu, Z. Zhang, W. Yao, H. Tan and Y. Zhu, *Energy & Environmental Science*, 2018, **11**, 2581-2589.
2. C. Fan, J. Miao, G. Xu, J. Liu, J. Lv and Y. Wu, *RSC Advances*, 2017, **7**, 37185-37193.
3. Y. Wang, P. Du, H. Pan, L. Fu, Y. Zhang, J. Chen, Y. Du, N. Tang and G. Liu, *Adv Mater*, 2019, **31**, e1807540.
4. H. Yu, R. Shi, Y. Zhao, T. Bian, Y. Zhao, C. Zhou, G. I. N. Waterhouse, L. Z. Wu, C. H. Tung and T. Zhang, *Adv Mater*, 2017, **29**.
5. C. Feng, L. Tang, Y. Deng, J. Wang, J. Luo, Y. Liu, X. Ouyang, H. Yang, J. Yu and J. Wang, *Advanced Functional Materials*, 2020, **30**.
6. C. Chu, Q. Zhu, Z. Pan, S. Gupta, D. Huang, Y. Du, S. Weon, Y. Wu, C. Muhich, E. Stavitski, K. Domen and J. H. Kim, *Proc Natl Acad Sci U S A*, 2020, **117**, 6376-6382.
7. X. Zeng, Y. Liu, Y. Kang, Q. Li, Y. Xia, Y. Zhu, H. Hou, M. H. Uddin, T. R. Gengenbach, D. Xia, C. Sun, D. T. McCarthy, A. Deletic, J. Yu and X. Zhang, *ACS Catalysis*, 2020, **10**, 3697-3706.
8. Y. X. Ye, J. Pan, F. Xie, L. Gong, S. Huang, Z. Ke, F. Zhu, J. Xu and G. Ouyang, *Proc Natl Acad Sci U S A*, 2021, **118**.

9. J. Cai, J. Huang, S. Wang, J. Iocozzia, Z. Sun, J. Sun, Y. Yang, Y. Lai and Z. Lin, *Adv Mater*, 2019, **31**, e1806314.
10. L. Chen, L. Wang, Y. Wan, Y. Zhang, Z. Qi, X. Wu and H. Xu, *Adv Mater*, 2020, **32**, e1904433.
11. J. Xiong, X. Li, J. Huang, X. Gao, Z. Chen, J. Liu, H. Li, B. Kang, W. Yao and Y. Zhu, *Applied Catalysis B: Environmental*, 2020, **266**.
12. L. Zhou, J. Feng, B. Qiu, Y. Zhou, J. Lei, M. Xing, L. Wang, Y. Zhou, Y. Liu and J. Zhang, *Applied Catalysis B: Environmental*, 2020, **267**.
13. P. Zhang, Y. Tong, Y. Liu, J. J. M. Vequizo, H. Sun, C. Yang, A. Yamakata, F. Fan, W. Lin, X. Wang and W. Choi, *Angew Chem Int Ed Engl*, 2020, **59**, 16209-16217.
14. Y. Shiraishi, T. Takii, T. Hagi, S. Mori, Y. Kofuji, Y. Kitagawa, S. Tanaka, S. Ichikawa and T. Hirai, *Nat Mater*, 2019, **18**, 985-993.
15. L. Shi, L. Yang, W. Zhou, Y. Liu, L. Yin, X. Hai, H. Song and J. Ye, *Small*, 2018, **14**.
16. Y. Yang, Z. Zeng, G. Zeng, D. Huang, R. Xiao, C. Zhang, C. Zhou, W. Xiong, W. Wang, M. Cheng, W. Xue, H. Guo, X. Tang and D. He, *Applied Catalysis B: Environmental*, 2019, **258**.
17. J. Tian, T. Wu, D. Wang, Y. Pei, M. Qiao and B. Zong, *Catalysis Today*, 2019, **330**, 171-178.
18. Y. Shiraishi, Y. Kofuji, H. Sakamoto, S. Tanaka, S. Ichikawa and T. Hirai, *ACS Catalysis*, 2015, **5**, 3058-3066.
19. S. Zhao, X. Zhao, H. Zhang, J. Li and Y. Zhu, *Nano Energy*, 2017, **35**, 405-414.
20. Y. Kofuji, S. Ohkita, Y. Shiraishi, H. Sakamoto, S. Tanaka, S. Ichikawa and T. Hirai, *ACS Catalysis*, 2016, **6**, 7021-7029.
21. S. Li, G. Dong, R. Hailili, L. Yang, Y. Li, F. Wang, Y. Zeng and C. Wang, *Applied Catalysis B: Environmental*, 2016, **190**, 26-35.
22. S. Zhao and X. Zhao, *Journal of Catalysis*, 2018, **366**, 98-106.
23. Y. Kofuji, Y. Isobe, Y. Shiraishi, H. Sakamoto, S. Tanaka, S. Ichikawa and T. Hirai, *J Am Chem Soc*, 2016, **138**, 10019-10025.
24. Y. Zheng, Z. Yu, H. Ou, A. M. Asiri, Y. Chen and X. Wang, *Advanced Functional Materials*, 2018, **28**.
25. C. Feng, L. Tang, Y. Deng, J. Wang, Y. Liu, X. Ouyang, H. Yang, J. Yu and J. Wang, *Applied Catalysis B: Environmental*, 2021, **281**.
26. Y. Shiraishi, S. Kanazawa, Y. Kofuji, H. Sakamoto, S. Ichikawa, S. Tanaka and T. Hirai, *Angew Chem Int Ed Engl*, 2014, **53**, 13454-13459.
27. H. Zhang, L. Jia, P. Wu, R. Xu, J. He and W. Jiang, *Applied Surface Science*, 2020, **527**.
28. J. Lei, B. Chen, W. Lv, L. Zhou, L. Wang, Y. Liu and J. Zhang, *ACS Sustainable Chemistry & Engineering*, 2019, **7**, 16467-16473.
29. W. Liu, C. Song, M. Kou, Y. Wang, Y. Deng, T. Shimada and L. Ye, *Chemical Engineering Journal*, 2021, **425**.
